# Supplementary material for: Structure and immunogenicity of a stabilized HIV-1 envelope trimer based on a group-M consensus sequence
Source: PubMed Central journal article supplement (PMC6541627; doi:10.1038/s41467-019-10262-5), 2019-05-29
Supplement: 41467_2019_10262_MOESM1_ESM.pdf [file 41467_2019_10262_MOESM1_ESM.pdf]

# **Structure and immunogenicity of a stabilized HIV-1 envelope trimer based on a group-M consensus sequence**

Sliepen, Han, Bontjer et al.

49  
64

**TPA leader**

HxB2 gp160 MRVKEKYQHLWRGWGWTMLLGLMLCS-----ATEKLWVTVYVYGVVWKEATTLFCASDAKAYDTE  
 ConM gp160 MRVVGIQRNQCQLL-WRWGILIFGLMLICS-----AAENLWVTVYVYGVVWKEATTLFCASDAKAYDTE  
 ConS gp160 MRVRGIQRNQCQLL-WRWGTLILGLMLICS-----AAENLWVTVYVYGVVWKEATTLFCASDAKAYDTE  
 ConM SOSIP.v7 MDAMKRLCCVLL-LOGAVFVSPSQEIHARFRRGARAENLWVTVYVYGVVWKEATTLFCASDAKAYDTE  
 BG505 SOSIP.664 MDAMKRLCCVLL-LOGAVFVSPSQEIHARFRRGARAENLWVTVYVYGVVWKEATTLFCASDAKAYDTE  
 BG505 SOSIP.v6 MDAMKRLCCVLL-LOGAVFVSPSQEIHARFRRGARAENLWVTVYVYGVVWKEATTLFCASDAKAYDTE

6566 73 106

HxB2 gp160 VHNVWATHACVPTDPNPQEVVLVNVTENFNMWKNMVEQMHEDIISLWDQSLKPCVKLTPLCVSLKCTDL  
 ConM gp160 VHNVWATHACVPTDPNPQEVVLENVTENFNMWKNMVEQMHEDIISLWDQSLKPCVKLTPLCVTLNCTDV  
 ConS gp160 VHNVWATHACVPTDPNPQEVVLENVTENFNMWKNMVEQMHEDIISLWDQSLKPCVKLTPLCVTLNCTNV  
 ConM SOSIP.v7 KHNWVATHACVPTDPNPQEVVLENVTENFNMWKNMVEQMHTDIIISLWDQSLKPCVKLTPLCVTLNCTDV  
 BG505 SOSIP.664 KHNWVATHACVPTDPNPQEVVLENVTENFNMWKNMVEQMHTDIIISLWDQSLKPCVKLTPLCVTLQCTNV  
 BG505 SOSIP.v6 KHNWVATHACVPTDPNPQEVVLENVTENFNMWKNMVEQMHTDIIISLWDQSLKPCVKLTPLCVTLQCTNV

165

HxB2 gp160 KNDTNTNSSSSGR-----MIMEKGEIKNCSFNISTSRGKVKQKEYAFFYKLDIIPIDNDTTS-----Y  
 ConM gp160 NATNNTFNNEE-----IKNCSFNITTEIRDKKKQVYALFYKLDVVPIDDNNS-----Y  
 ConS gp160 NVTNTNNTTEEK-----GEIKNCSFNITTEIRDKKKQVYALFYRLDVPIDNNNNSSN-----Y  
 ConM SOSIP.v7 NATNNTFNNEE-----IKNCSFNITTEIRDKKKQVYALFYKLDVVPIDDNNS-----Y  
 BG505 SOSIP.664 T-NNITDDMR-----GELKNCSFMTTEIRDKKKQVYSLFYRLDVPINENQGNRSNNSNKEY  
 BG505 SOSIP.v6 T-NNITDDMR-----GELKNCSFMTTEIRDKKKQVYSLFYRLDVPINENQGNRSNNSNKEY

316

HxB2 gp160 NGSLAEEEVVIRSVNFTDNAKTIIVQLNTSVEINCRPNNTTRKRIRIQRGPGRAFVTIG-KIGNMRQAH  
 ConM gp160 NGSLAEEEIIIRSENITNNAKTIIVQLNESVEINCRPNNTTRKSIIRI--GPQAFYATGDIIGDIRQAH  
 ConS gp160 NGSLAEEEIIIRSENITNNAKTIIVQLNESVEINCRPNNTTRKSIIRI--GPQAFYATGDIIGDIRQAH  
 ConM SOSIP.v7 NGSLAEEEIIIRSENITNNAKTIIVQLNESVEINCRPNNTTRKSIIRI--GPQWFYATGDIIGDIRQAH  
 BG505 SOSIP.664 NGSLAEEEVVIRSENITNNAKTIIVQFNTPVQINCRPNNTTRKSIIRI--GPQAFYATGDIIGDIRQAH  
 BG505 SOSIP.v6 NGSLAEEEVVIRSENITNNAKTIIVQFNTPVQINCRPNNTTRKSIIRI--GPQWFYATGDIIGDIRQAH

HxB2 gp160 CNISRAKWNNTLQKIAASKLREDFGNKTIIFKQSSGGDPEIVTHSFNCGGEFFYCNSTQLFNSTWFNSTW  
 ConM gp160 CNISRTKWNKTLQVAKKLREHFN-KTII-FNPSSGGDLEITTHSFNCGGEFFYCNSTSELFNSTWNG---  
 ConS gp160 CNISGTWKNKTLQVAKKLREHFNNKTIIFKPSGGDLEITTHSFNCRGGEFFYCNSTSELFNSTWIGN--  
 ConM SOSIP.v7 CNISRTKWNKTLQVAKKLREHFN-KTII-FNPSSGGDLEITTHSFNCGGEFFYCNSTSELFNSTWNG---  
 BG505 SOSIP.664 CNVSKATWNETLQKVVKQLRKHFGNNTIIRFANSSGGDLEVTTHSFNCGGEFFYCNSTSELFNSTWISN-T  
 BG505 SOSIP.v6 CNVSKATWNETLQKVVKQLRKHFGNNTIIRFANSSGGDLEVTTHSFNCGGEFFYCNSTSELFNSTWISN-T

429 432

HxB2 gp160 STEGSNTEGSDTITLPCRICKIINMWQKVGKAMYAPPISQIIRCSNITGLLLTRDGGNSNNE-SEIFR  
 ConM gp160 -----TNNTITLPCRICKIINMWQGVQAMYAPPIEGKIRCTSNITGLLLTRDGGNNNT--ETFR  
 ConS gp160 --GTKNNNTNDTITLPCRICKIINMWQGVQAMYAPPIEGKITCKSNITGLLLTRDGGNNNTNETEIFR  
 ConM SOSIP.v7 -----TNNTITLPCRICKIINMWQRVQAMYAPPIEGKIRCTSNITGLLLTRDGGNNNT--ETFR  
 BG505 SOSIP.664 SVQGSNSTGSDSITLPCRICKIINMWQRIQAMYAPPIQGVIRCVSNITGLLLTRDGGSTNST-TETFR  
 BG505 SOSIP.v6 SVQGSNSTGSDSITLPCRICKIINMWQRIQAMYAPPIQGVIRCVSNITGLLLTRDGGSTNST-TETFR

500501 535

HxB2 gp160 PGGGDMRDNRSELYKYVVKIEPLGVAPTAKRRRWQREKR--AVGIGALFLGFLGAAGSTMGAASMTL  
 ConM gp160 PGGGDMRDNRSELYKYVVKIEPLGVAPTAKRRRWEREKR--AVGIGAVFLGFLGAAGSTMGAASITL  
 ConS gp160 PGGGDMRDNRSELYKYVVKIEPLGVAPTAKRRRWEREKR--AVGIGAVFLGFLGAAGSTMGAASITL  
 ConM SOSIP.v7 PGGGDMRDNRSELYKYVVKIEPLGVAPTAKRRRWRRRRRAVIGAVFLGFLGAAGSTMGAASMTL  
 BG505 SOSIP.v6 PGGGDMRDNRSELYKYVVKIEPLGVAPTAKRRRWRRRRRAVIGAVFLGFLGAAGSTMGAASMTL  
 BG505 SOSIP.v6 PGGGDMRDNRSELYKYVVKIEPLGVAPTAKRRRWRRRRRAVIGAVFLGFLGAAGSTMGAASMTL

543 555 559 561 605

HxB2 gp160 TVQARQLLSGIVQQSNLLRAIEAQQHLLQLTVWGIKQLQARVLAVERYLKDQQLLGIWGCSSGKLICTTA  
 ConM gp160 TVQARQLLSGIVQQSNLLRAIEAQQHLLQLTVWGIKQLQARVLAVERYLKDQQLLGIWGCSSGKLICTTN  
 ConS gp160 TVQARQLLSGIVQQSNLLRAIEAQQHLLQLTVWGIKQLQARVLAVERYLKDQQLLGIWGCSSGKLICTTT  
 ConM SOSIP.v7 TVQARQLLSGIVQQSNLLRAIEAQQHLLQLTVWGIKQLQARVLAVERYLKDQQLLGIWGCSSGKLICTN  
 BG505 SOSIP.664 TVQARNLLSGIVQQSNLLRAIEAQQHLLKLTWVGIKQLQARVLAVERYLKDQQLLGIWGCSSGKLICTN  
 BG505 SOSIP.v6 TVQARNLLSGIVQQSNLLRAIEAQQHLLKLTWVGIKQLQARVLAVERYLKDQQLLGIWGCSSGKLICTN

664

HxB2 gp160 VPWNSWSNKSLEQIWNHTTWMEWDREINNYTSLIHSLEESQSQEKNQEQLLELDKWA SLWNWFNITN  
 ConM gp160 VPWNSWSNKSQDEIWDNMTWMEWDKEINNYTDIYLSLEESQSQEKNQEQLLELDKWA SLWNWFNITN  
 ConS gp160 VPWNSWSNKSQDEIWDNMTWMEWEREINNYTDIYLSLEESQSQEKNQEQLLELDKWA SLWNWFNITN  
 ConM SOSIP.v7 VPWNSWSNKSQDEIWDNMTWMEWDKEINNYTDIYLSLEESQSQEKNQEQLLELD-----  
 BG505 SOSIP.v6 VPWNSWSNRLNSEIWDNMTWLQWDKEISNYTQIYGLLEESQSQEKNQEQLLELD-----  
 BG505 SOSIP.v6 VPWNSWSNRLNSEIWDNMTWLQWDKEISNYTQIYGLLEESQSQEKNQEQLLELD-----

**Supplementary Figure 1.** Amino acid sequence alignment of ConM SOSIP.v7 with HxB2 gp160, ConM gp160 (alignment ID: 104CP2), ConS gp160, BG505 SOSIP.664 and BG505 SOSIP.v6. The SOSIP design, trimer-stabilizing and improved trimerization mutations are indicated in bold<sup>1</sup>; the extra intermolecular disulfide bond in red<sup>2</sup>; and the TD8 mutations in blue<sup>3</sup> (HxB2 numbering).

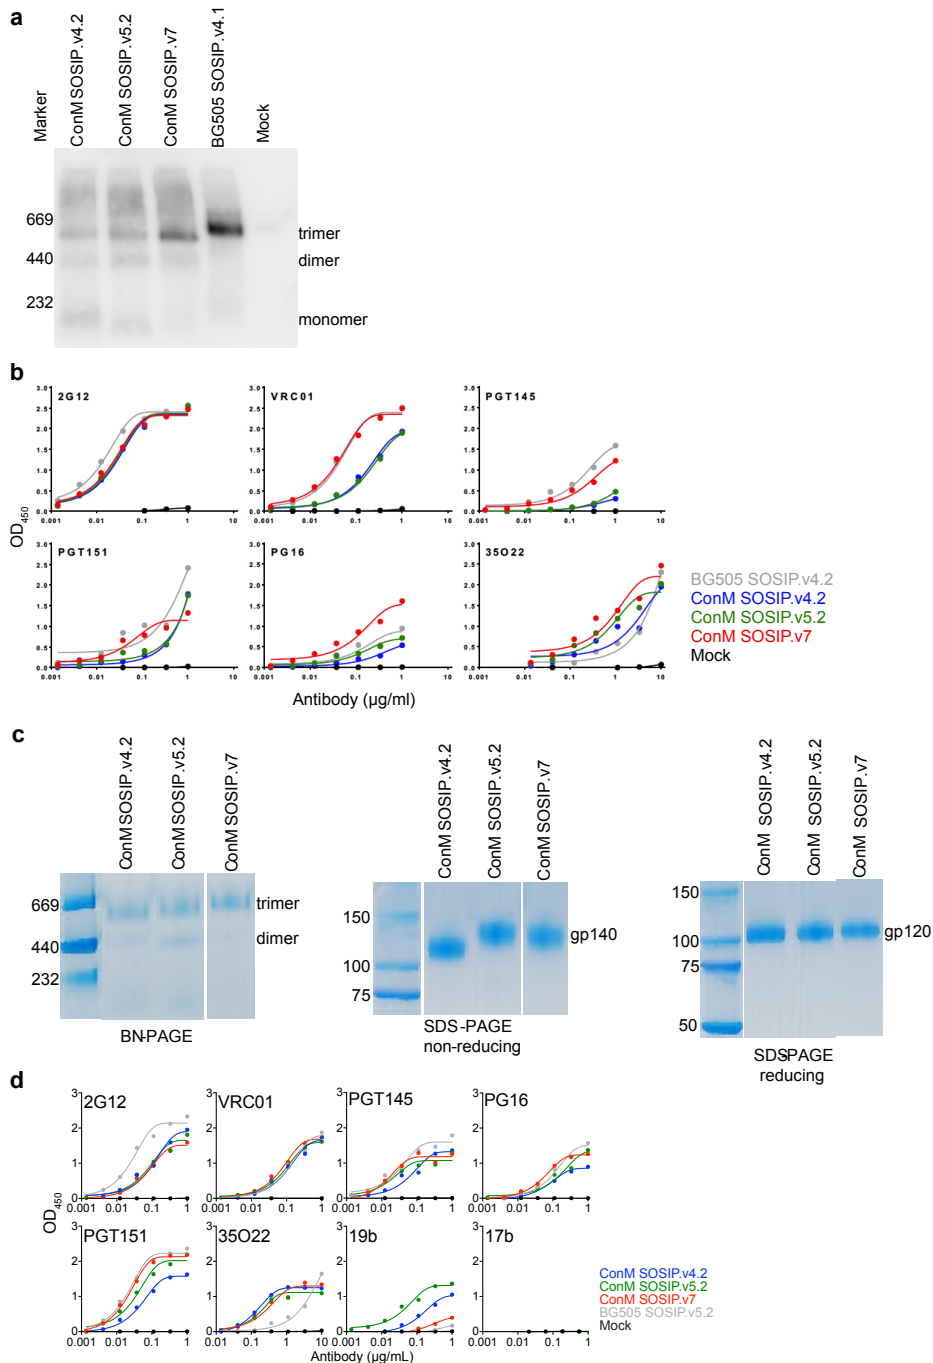

**Supplementary Figure 2.** Screening and characterization of ConM SOSIP.v4.2, SOSIP.v5.2 and SOSIP.v7 trimers. **a** BN-PAGE analysis of unpurified D7324-tagged SOSIP trimers expressed in 293T cells followed by Western blotting with 2G12/VRC01. **b** D7324-capture ELISA with unpurified D7324-tagged SOSIP trimers. **c** PGT145-purified SOSIP trimers were analyzed by BN-PAGE analysis, reducing (+DTT) and non-reducing (-DTT) SDS-PAGE followed by Coomassie Blue staining. We note the difference in migration pattern of SOSIP.v4 and SOSIP.v5 trimers in non-reducing SDS-PAGE gels, which are consistent with previous results showing that SOSIP.v5 proteins, which contain an extra intraprotomer disulfide bond between the gp120 and gp41, migrate more slowly than their SOSIP.664 and SOSIP.v4 counterparts. The likely explanation is a decrease in SDS uptake when a protein becomes more compact <sup>2</sup>. **d** D7324-capture ELISA with PGT145-purified ConM SOSIP trimer (D7324-tagged) expressed in 293F cells against a panel of bNAbs.

a

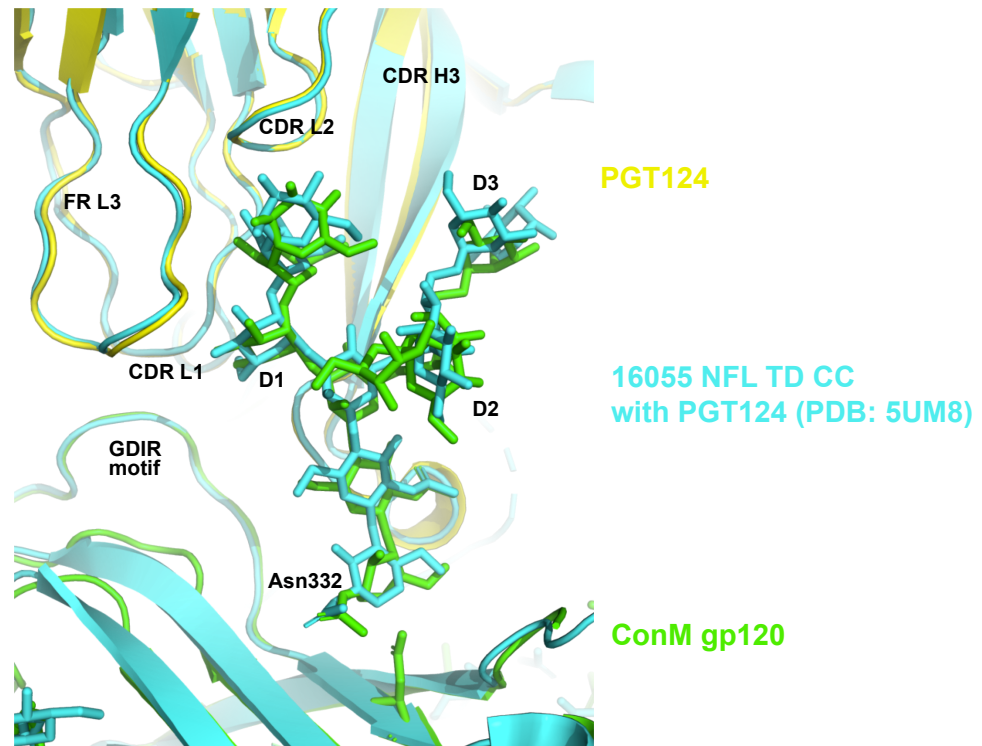

b

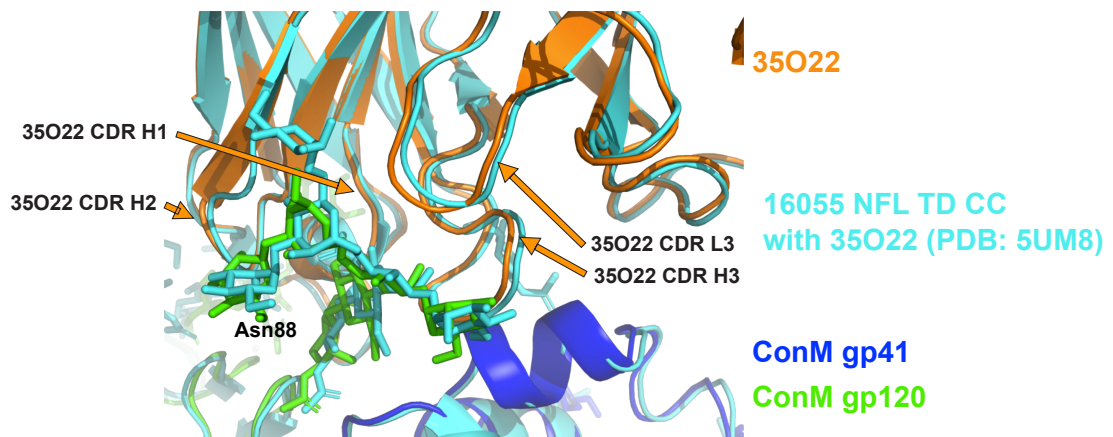

**Supplementary Figure 3.** Binding modes of PGT124 and 35022 to ConM SOSIP.v7. **a.** Interaction of the CDR loops of PGT124 in yellow with the oligomannose glycan at the Asn332 supersite in green stick representation and  $^{324}\text{GDIR}^{327}$  motif at the V3 loop base. The  $^{324}\text{GDIR}^{327}$  motif and D1/D2/D3 arms in the oligomannose glycan at Asn332 are labeled. The structure of 16055 NFL TD CC in complex with PGT124 and 35022 is represented in cyan cartoon for comparison. **b.** Interaction of the CDR loops of 35022 in orange with the gp120/gp41 interface. gp120 and gp41 are represented as green and blue cartoon, respectively.

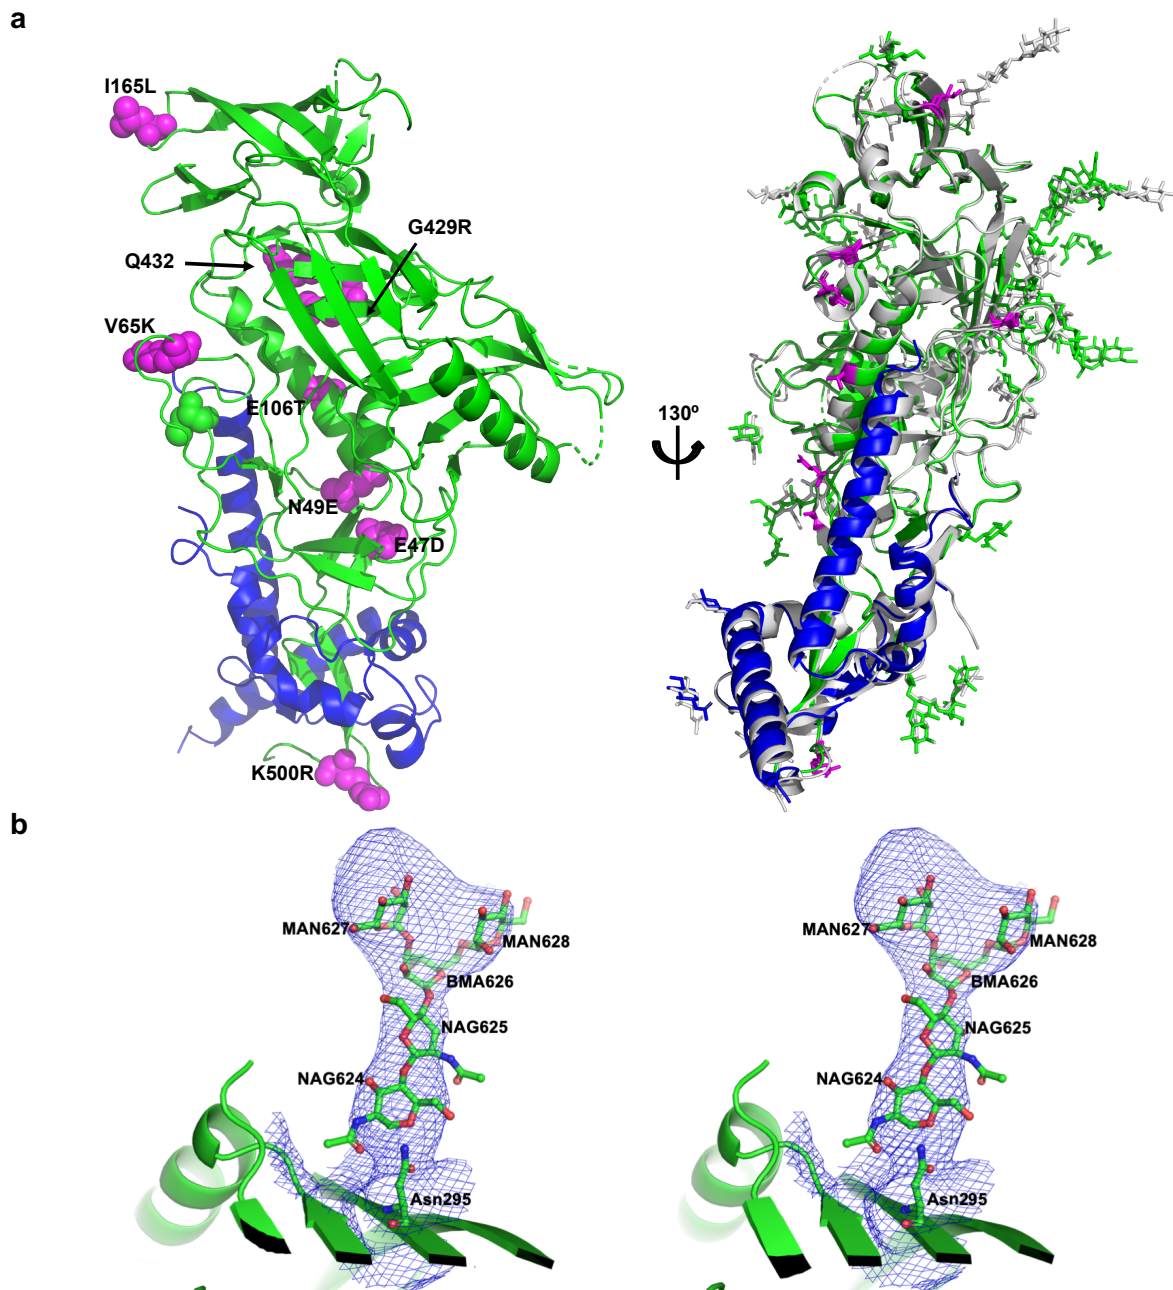

**Supplementary Figure 4.** Structural features of ConM SOSIP.v7. **a.** Characteristics of TD8 residues of ConM SOSIP.v7. All TD8 residues (E47D, N49E, V65K, E106T, I165L, G429R, Q432, and K500R) could be resolved in the crystal structure of ConM SOSIP.v7 in complex with bNAbs PGT124 and 35O22. Gp120 and gp41 are represented by green and blue cartoons, respectively, and TD8 residues are shown as magenta spheres (left panel). Superposition of ConM SOSIP.v7 with BG505 SOSIP.664 (PDB ID: 5CEZ) shows that the TD8 residues in ConM SOSIP.v7 are structurally similar to those in BG505 SOSIP.664 in stabilizing the Env trimers (right panel). The BG505 SOSIP.664 structure is represented in gray cartoon model and the TD8 residues in ConM SOSIP.v7 and BG505 SOSIP.664 are shown in magenta stick models. **b.** Stereo image of Asn295 and linked glycans (NAG624-MAN628).  $2mF_o-DF_c$  electron density maps are shown at  $1.0\sigma$ . Asn295 and linked glycans are represented by stick models, and carbon, nitrogen, and oxygen atoms are shown in green, blue, and red, respectively.

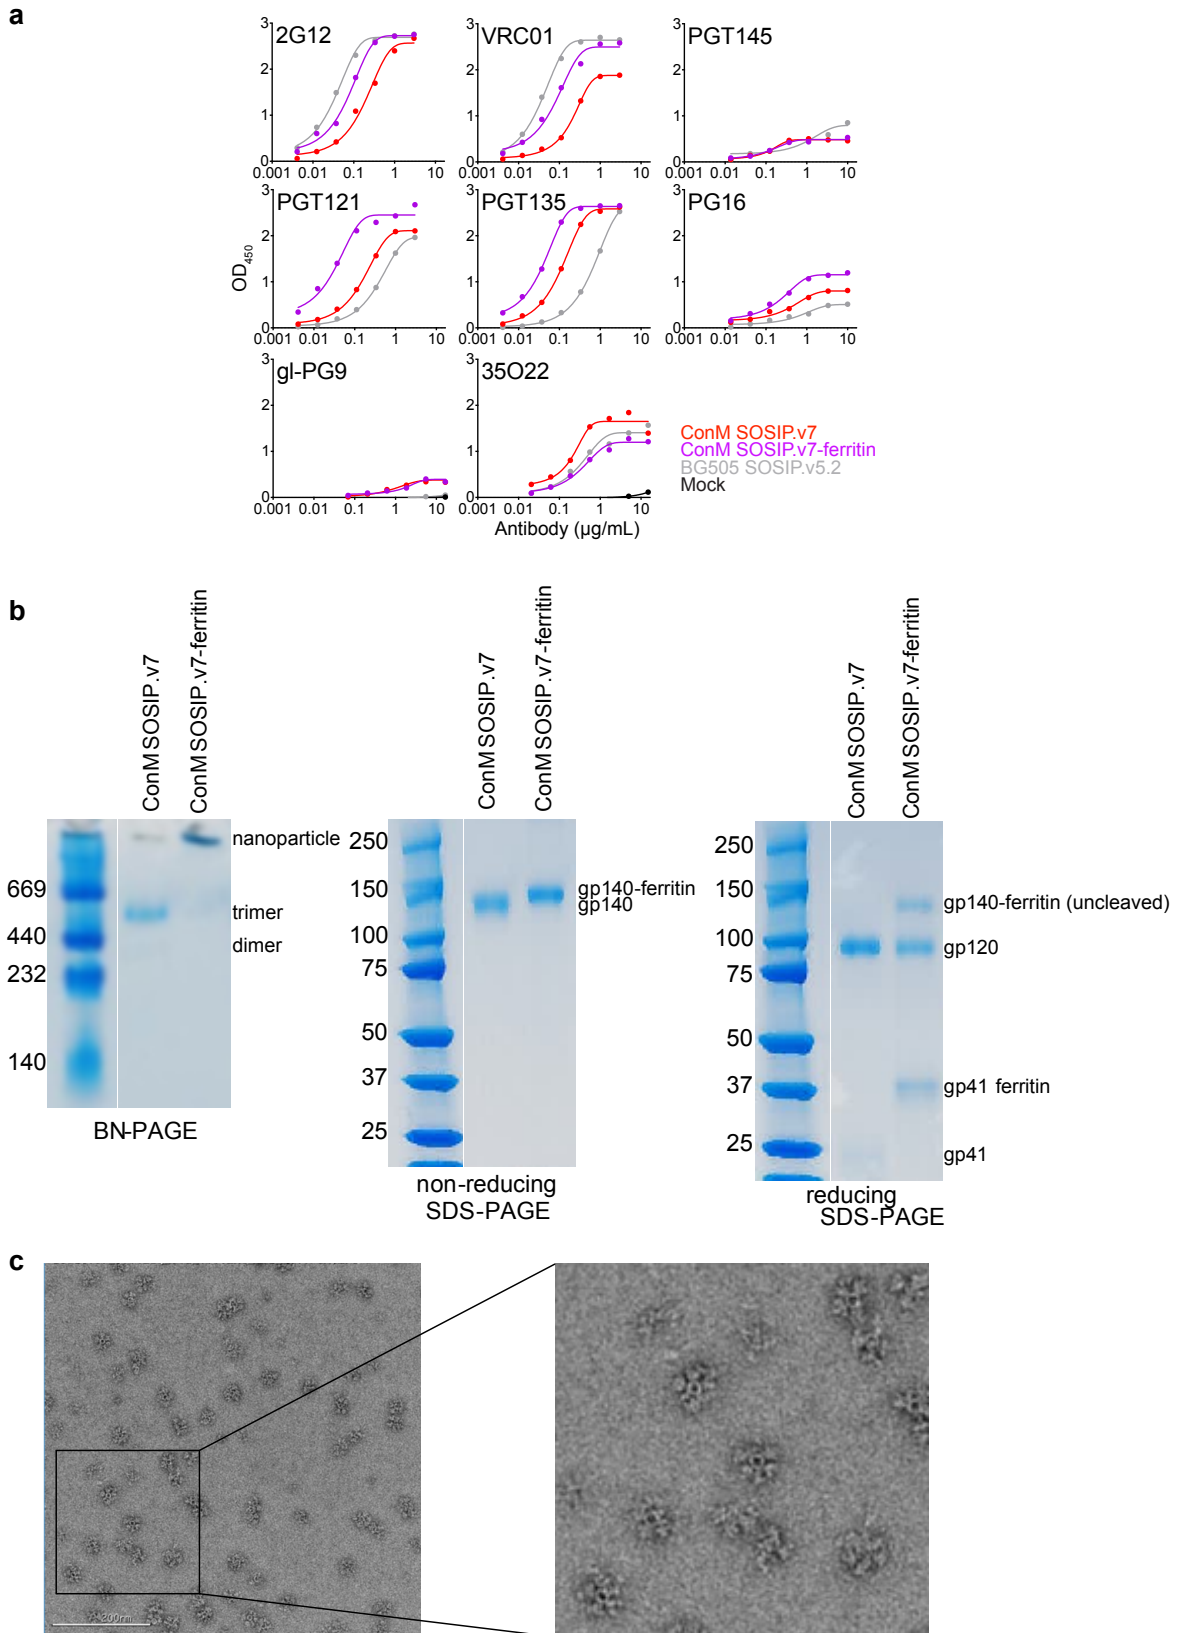

**Supplementary Figure 5** Characterization of ConM SOSIP.v7-ferritin nanoparticles. **a.** Lectin-capture ELISA with PGT145-purified ConM SOSIP.v7 trimers and ConM SOSIP.v7-ferritin nanoparticles expressed in 293F cells. **b.** PGT145-purified SOSIP-ferritin was analyzed by BN-PAGE analysis, reducing (+DTT) and non-reducing (-DTT) SDS-PAGE followed by Coomassie Blue staining. **c.** NS-EM images of PGT145-purified ConM SOSIP.v7-ferritin.

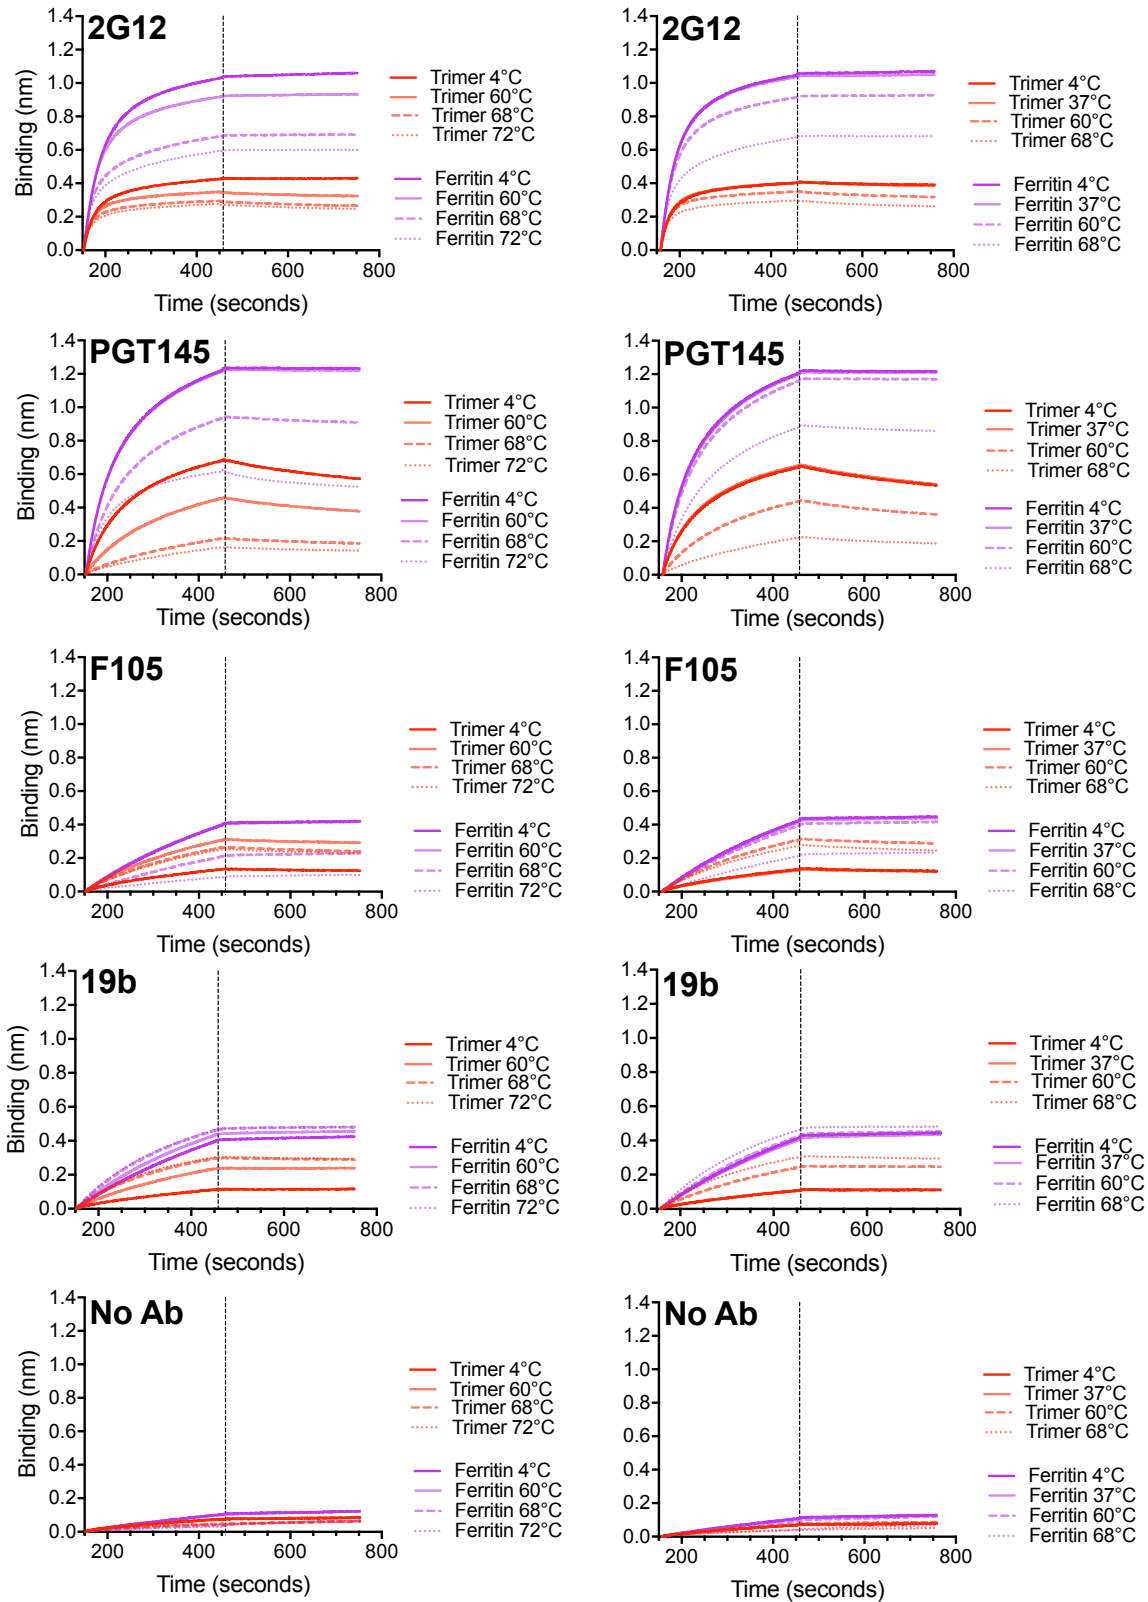

**Supplementary Figure 6.** Thermostability of antibody epitopes on ConM SOSIP.v7 trimers and nanoparticles. BLI binding curves of 2G12, PGT145, F105 and 19b to ConM SOSIP.v7 trimers and ConM SOSIP.v7-ferritin nanoparticles incubated at different temperatures. The results of two independent experiments are shown (left and right panels) and the average AUC values are plotted in Fig. 5f.

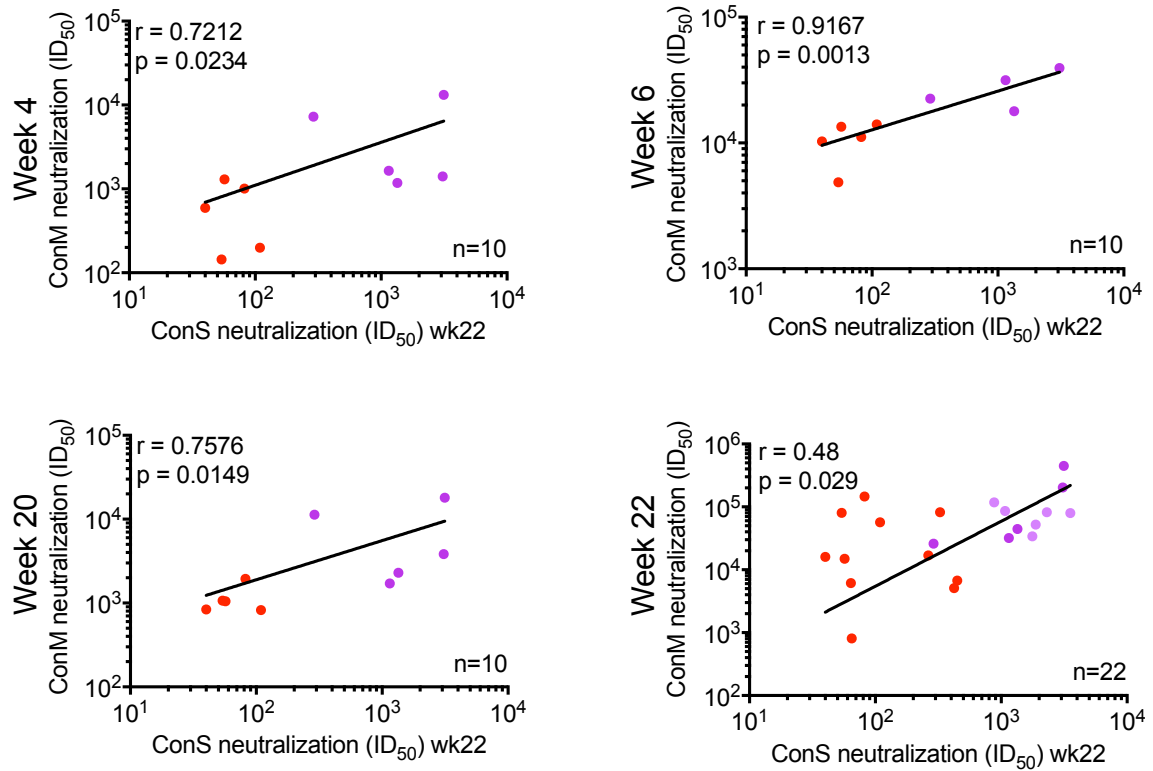

**Supplementary Figure 7.** Correlation between ConM and ConS neutralization. Plots show the correlation between the neutralization titers (ID<sub>50</sub>) of the autologous Tier 1A virus at different timepoints with the related Tier 1B ConS virus at week 22. Titers against ConM for weeks 4, 6 and 20 are from Fig. 4C (n=10) and for week 22 from Supplementary Table 4 (n=22). ConM trimer immunized animals are in red and the nanoparticle immunized animals in magenta. Spearman r and p values are given.



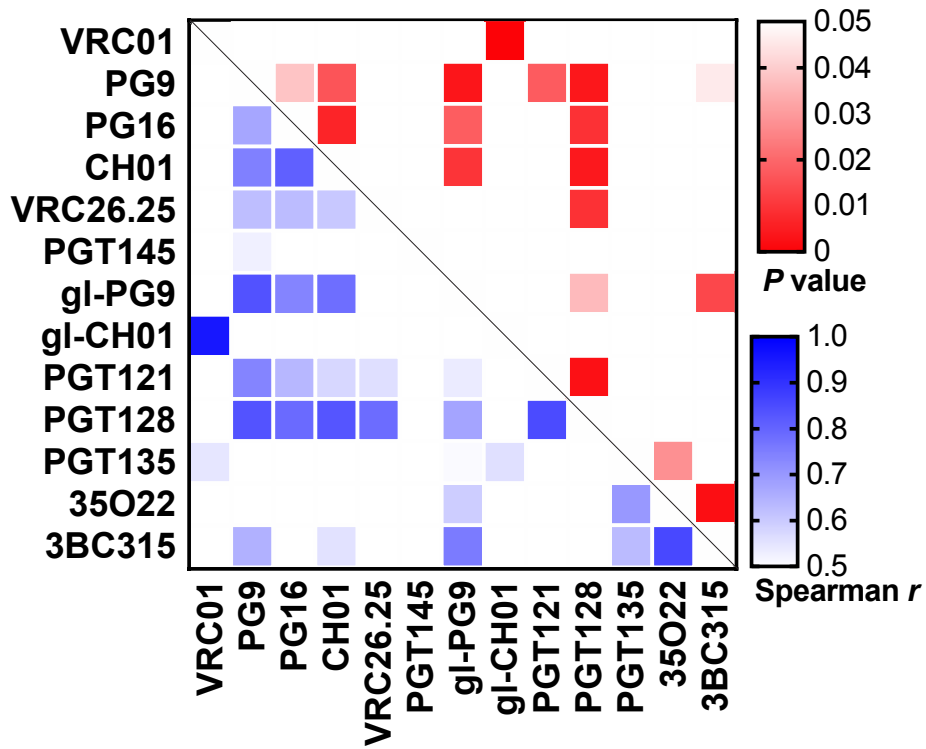

**Supplementary Figure 8.** Correlation matrix of bNAb binding interference by sera of ConM immunized rabbits. The competition ELISA values are shown in Fig. 5a. Spearman  $r$  values are represented in blue of increasing intensity and the corresponding P values are in red of increasing intensity.

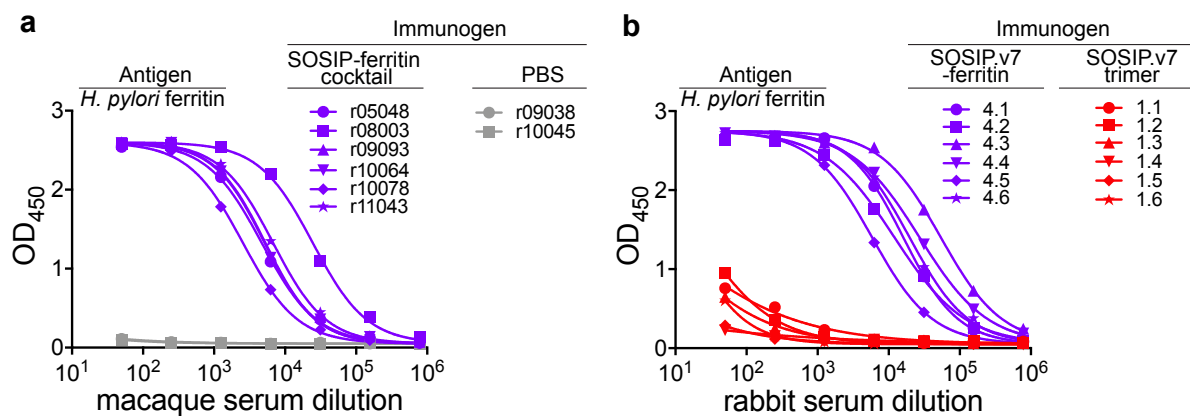

**Supplementary Figure 9.** Immunogenicity of the ferritin component of ConM SOSIP.v7 ferritin nanoparticles. ELISA binding curves against His-tagged ferritin (devoid of Env) using week 22 sera from immunized macaques (a) and rabbits (b).

|           |                       |            | 501C-605C | I559P | R6    | ΔMPER | 64K | 66R | 316W | 535M  | 543Q  | 543N | 72C-564C | 73C-561C | 49C-555C | 47D <sup>c</sup> | 49E <sup>c</sup> | 65K <sup>c</sup> | 106T <sup>c</sup> | 165L <sup>c</sup> | 429R <sup>c</sup> | 432Q <sup>c</sup> | 500R <sup>c</sup> |
|-----------|-----------------------|------------|-----------|-------|-------|-------|-----|-----|------|-------|-------|------|----------|----------|----------|------------------|------------------|------------------|-------------------|-------------------|-------------------|-------------------|-------------------|
| SOSIP.681 | SOSIP.v1              | SOSIP.v1   | Green     | Green | Green | Red   | Red | Red | Red  | Red   | Red   | Red  | Red      | Red      | Red      | Red              | Red              | Red              | Red               | Red               | Red               | Red               | Red               |
| SOSIP.664 | SOSIP.v2              | SOSIP.v2   | Green     | Green | Green | Red   | Red | Red | Red  | Red   | Red   | Red  | Red      | Red      | Red      | Red              | Red              | Red              | Red               | Red               | Red               | Red               | Red               |
|           | SOSIP.v3              | SOSIP.v3.1 | Green     | Green | Green | Red   | Red | Red | Red  | Green | Green | Red  | Red      | Red      | Red      | Red              | Red              | Red              | Red               | Red               | Red               | Red               | Red               |
|           |                       | SOSIP.v3.2 | Green     | Green | Green | Red   | Red | Red | Red  | Green | Green | Red  | Red      | Red      | Red      | Red              | Red              | Red              | Red               | Red               | Red               | Red               | Red               |
|           | SOSIP.v4 <sup>a</sup> | SOSIP.v4.1 | Green     | Green | Green | Red   | Red | Red | Red  | Green | Green | Red  | Red      | Red      | Red      | Red              | Red              | Red              | Red               | Red               | Red               | Red               | Red               |
|           |                       | SOSIP.v4.2 | Green     | Green | Green | Red   | Red | Red | Red  | Green | Green | Red  | Red      | Red      | Red      | Red              | Red              | Red              | Red               | Red               | Red               | Red               | Red               |
|           | SOSIP.v5 <sup>b</sup> | SOSIP.v5.1 | Green     | Green | Green | Red   | Red | Red | Red  | Green | Green | Red  | Red      | Red      | Red      | Red              | Red              | Red              | Red               | Red               | Red               | Red               | Red               |
|           |                       | SOSIP.v5.2 | Green     | Green | Green | Red   | Red | Red | Red  | Green | Green | Red  | Red      | Red      | Red      | Red              | Red              | Red              | Red               | Red               | Red               | Red               | Red               |
|           | SOSIP.v6 <sup>b</sup> | SOSIP.v6   | Green     | Green | Green | Red   | Red | Red | Red  | Green | Green | Red  | Red      | Red      | Red      | Red              | Red              | Red              | Red               | Red               | Red               | Red               | Red               |
|           | SOSIP.v7              | SOSIP.v7   | Green     | Green | Green | Red   | Red | Red | Red  | Green | Green | Red  | Red      | Red      | Red      | Red              | Red              | Red              | Red               | Red               | Red               | Red               | Red               |

**Supplementary Table 1.** Nomenclature for the stabilized ConM SOSIP trimers, related to Fig. 1b. The modifications included in each SOSIP version are indicated in green (present) and red (not present).

<sup>a</sup> described in de Taeye et al. 2015<sup>1</sup>

<sup>b</sup> described in Torrents de la Peña et al. 2017<sup>2</sup>

<sup>c</sup> described in Guenaga et al. 2015<sup>3</sup>

| ConM SOSIP.v7 |              |                                                 | Clade A<br>(BG505,<br>PDB 5FYL) |                 | Clade B<br>(JR-FL,<br>PDB 5FYK) |                 | Clade G<br>(X1193.c1,<br>PDB 5FYJ) |                 |
|---------------|--------------|-------------------------------------------------|---------------------------------|-----------------|---------------------------------|-----------------|------------------------------------|-----------------|
| N glycan      | Residue      | Glycan moieties<br>(residue number in PDB file) | N glycan                        | Glycan moieties | N glycan                        | Glycan moieties | N glycan                           | Glycan moieties |
| N88           | N88          | 6 (601-606)                                     | N88                             | 7               | N88                             | 7               | N88                                | 8               |
| N130          | N130         | 1 (607)                                         |                                 |                 |                                 |                 |                                    |                 |
| N133          | D133         |                                                 | N133                            | 2               |                                 |                 | N133                               | 1               |
| N135          | N135         |                                                 |                                 |                 | N135                            | 1               |                                    |                 |
| N137          | T137         |                                                 | N137                            | 7               |                                 |                 |                                    |                 |
| N142          | N142         |                                                 |                                 |                 |                                 |                 | N142                               | 1               |
| N156          | N156         |                                                 | N156                            | 9               | N156                            | 9               | N156                               | 11              |
| N160          | N160         | 1 (608)                                         | N160                            | 8               | N160                            | 7               | N160                               | 9               |
| N187          | N187         |                                                 |                                 |                 | N187                            | 7               |                                    |                 |
| N188          | N188         |                                                 |                                 |                 |                                 |                 | N188                               | 10              |
| N190          |              |                                                 |                                 |                 |                                 |                 |                                    |                 |
| N190C         |              |                                                 |                                 |                 |                                 |                 |                                    |                 |
| N197          | N197         | 1 (609)                                         | N197                            | 6               |                                 |                 | N197                               | 3               |
| N234          | N234         | 4 (610-613)                                     | N234                            | 5               |                                 |                 | N234                               | 6               |
| N241          | N241         | 2 (614-615)                                     |                                 |                 | N241                            | 4               | N241                               | 7               |
| N262          | N262         | 7 (616-622)                                     | N262                            | 8               | N262                            | 9               | N262                               | 11              |
| N276          | N276         | 1 (623)                                         | N276                            | 5               | N276                            | 8               | N276                               | 9               |
| N293          | E293         |                                                 |                                 |                 |                                 |                 | N293                               | 9               |
| N295          | N295         | 5 (624-628)                                     | N295                            | 7               | N295                            | 5               |                                    |                 |
| N301          | N301         | 2 (629-630)                                     | N301                            | 8               | N301                            | 8               | N301                               | 6               |
| N332          | N332         | 10 (631-639, 635A)                              | N332                            | 10              | N332                            | 10              | N332                               | 10              |
| N339          | N339         |                                                 | N339                            | 1               | N339                            | 8               |                                    |                 |
| N344          | Q344         |                                                 |                                 |                 |                                 |                 | N344                               | 7               |
| N355          | N355         |                                                 | N355                            | 1               | N355                            | 7               | N355                               | 3               |
| N362          | N362         |                                                 |                                 |                 | N362                            | 4               |                                    |                 |
| N363          | P363         |                                                 | N363                            | 3               |                                 |                 |                                    |                 |
| N386          | N386         | 5 (640-644)                                     | N386                            | 6               | N386                            | 8               | N386                               | 8               |
| N392          | N392         | 2 (645-646)                                     | N392                            | 6               | N392                            | 6               | N392                               | 1               |
| N397          | N396         |                                                 |                                 |                 | N397                            | 2               |                                    |                 |
| N413          | N411 or N412 |                                                 |                                 |                 |                                 |                 | N413                               | 10              |
| N442          | K442         |                                                 |                                 |                 |                                 |                 | N442                               | 6               |
| N448          | N448         | 1 (647)                                         | N448                            | 6               | N448                            | 6               |                                    |                 |
| N462          | N462         |                                                 |                                 |                 |                                 |                 |                                    |                 |
| N463          | N463         |                                                 |                                 |                 | N463                            | 2               |                                    |                 |
| N464          | N464         |                                                 |                                 |                 |                                 |                 | N464A                              | 2               |
| N611          | N611         | 1 (701)                                         | N611                            | 1               | N611                            | 3               | N611                               | 2               |
| N616          | N616         |                                                 |                                 |                 | N616                            | 1               | N616                               | 2               |
| N618          | S618         |                                                 | N618                            | 1               |                                 |                 |                                    |                 |
| N625          | N625         |                                                 |                                 |                 | N625                            | 1               | N625                               | 3               |
| N637          | N637         | 1 (702)                                         | N637                            | 3               | N637                            | 1               | N637                               | 2               |

**Supplementary Table 2.** Glycans observed in the ConM SOSIP.v7 structure in complex with PGT124 and 35022. Possible Asn sequons were summarized from BG505 SOSIP.664 (clade A, <sup>4</sup>), BG505 (clade A, PDB: 5FYL), JR-FL (clade B, PDB: 5FYK), and X11.93.c1 (clade G, PDB: 5FYJ) <sup>5</sup>.

| Residue No. | ConM gp140 wt | Amino acid conservation rate | BG505 gp140 T332N wt | Amino acid conservation rate | Conservation rate gap between ConM and BG505 | Consensus                                                                                                                                                                                |
|-------------|---------------|------------------------------|----------------------|------------------------------|----------------------------------------------|------------------------------------------------------------------------------------------------------------------------------------------------------------------------------------------|
| 630         | E             | 35.23%                       | Q                    | 62.40%                       | 27.17%                                       | Q62.40%; E35.23%; D1.37%; K0.54%; A0.15%; X0.10%; R0.07%; G0.05%; L0.02%; M0.02%; P0.02%; S0.02%                                                                                         |
| 636         | N             | 17.49%                       | S                    | 40.61%                       | 23.12%                                       | S40.61%; D32.72%; N17.49%; E3.88%; G2.63%; I0.83%; H0.51%; A0.41%; R0.28%; T0.23%; X0.11%; Q0.10%; F0.05%; Y0.05%; K0.03%; V0.03%; C0.02%                                                |
| 152         | E             | 22.15%                       | G                    | 41.51%                       | 19.36%                                       | G41.51%; E22.15%; D10.47%; K3.93%; T3.70%; N3.58%; G2.30%; Q2.08%; I1.60%; M0.79%; P0.61%; X0.56%; L0.52%; Y0.11%; W0.08%; H0.07%; C0.05%; F0.02%                                        |
| 646         | I             | 40.72%                       | L                    | 58.97%                       | 18.25%                                       | L58.97%; I40.72%; X0.08%; F0.05%; T0.03%; A0.02%; C0.02%; H0.02%; P0.02%; R0.02%; S0.02%; Y0.02%; Y0.02%                                                                                 |
| 412         | N             | 4.97%                        | D                    | 23.09%                       | 18.12%                                       | D23.09%; G17.24%; S14.69%; E13.60%; I10.47%; N4.97%; K4.27%; A3.58%; R1.52%; I1.36%; L0.92%; V0.90%; P0.80%; Q0.61%; X0.57%; Y0.21%; H0.18%; F0.11%; M0.10%; C0.05%; W0.02%              |
| 170         | K             | 30.76%                       | Q                    | 46.88%                       | 16.12%                                       | Q46.88%; K30.76%; R9.55%; H2.13%; E2.11%; T1.44%; L1.01%; N0.69%; S0.46%; M0.26%; X0.20%; V0.16%; I0.13%; Y0.13%; A0.07%; D0.07%; F0.03%; P0.03%; W0.03%; #0.02%; G0.02%                 |
| 389         | E             | 4.52%                        | G                    | 18.91%                       | 14.39%                                       | G18.91%; E4.52%; K19.91%; N6.09%; R5.97%; E4.52%; P3.81%; S3.71%; I3.57%; Q3.45%; P3.34%; V2.83%; A2.65%; M2.23%; Y1.98%; L1.01%; X0.93%; C0.49%; W0.49%; F0.34%; H0.29%; #0.02%; W0.02% |
| 619         | Q             | 21.32%                       | L                    | 34.96%                       | 13.64%                                       | L34.96%; Q21.32%; F3.81%; E3.66%; H3.19%; K2.77%; V2.34%; M2.21%; I1.28%; R1.05%; W0.33%; X0.26%; T0.21%; S0.18%; D0.13%; N0.13%; A0.08%; G0.03%; #0.02%; P0.02%                         |
| 133         | D             | 36.45%                       | N                    | 43.98%                       | 7.53%                                        | N43.98%; D36.45%; E5.50%; K3.62%; T2.59%; S2.05%; H1.52%; A1.16%; Y0.70%; Q0.46%; X0.39%; P0.34%; G0.33%; I0.29%; R0.16%; M0.10%; V0.10%; C0.05%; L0.05%; F0.03%; #0.02%                 |
| 410         | T             | 16.03%                       | S                    | 21.19%                       | 5.16%                                        | S21.19%; T16.03%; N15.13%; G11.52%; E6.77%; D6.66%; L3.03%; A2.86%; C2.32%; K2.18%; I2.01%; P1.95%; R1.47%; V1.37%; Q0.75%; Y0.70%; H0.46%; X0.38%; F0.34%; M0.29%; W0.10%; #0.03%       |
| 446         | T             | 8.88%                        | V                    | 11.53%                       | 2.65%                                        | V11.53%; T8.88%; N10.52%; H8.88%; E7.00%; R6.22%; I4.61%; L3.30%; A1.19%; D1.16%; Q0.28%; H0.25%; X0.20%; M0.18%; P0.15%; G0.13%; F0.08%; Y0.07%; C0.05%; #0.02%; #0.02%                 |
| 151         | N             | 4.89%                        | R                    | 7.53%                        | 2.64%                                        | R7.53%; N4.89%; G10.44%; R7.53%; N4.89%; D4.22%; S3.71%; I3.57%; Q3.45%; P3.34%; V2.83%; A2.65%; M2.23%; Y1.98%; L1.01%; X0.93%; C0.49%; W0.49%; F0.34%; H0.29%; #0.02%; #0.05%          |
| 442         | K             | 5.53%                        | V                    | 7.84%                        | 2.31%                                        | V7.84%; K5.53%; I7.95%; V7.84%; L6.59%; K5.53%; E3.93%; S3.88%; P3.78%; R3.53%; T1.98%; Y1.00%; A0.98%; H0.82%; D0.67%; M0.54%; X0.13%; F0.11%; W0.11%; G0.07%; C0.03%; #0.02%           |
| 186         | D             | 16.34%                       | E                    | 16.43%                       | 0.09%                                        | D16.34%; E16.43%; G12.42%; K7.82%; S6.23%; T1.29%; R1.05%; A0.80%; Q0.62%; P0.61%; X0.31%; H0.25%; V0.25%; I0.23%; L0.08%; M0.07%; Y0.07%; C0.02%; F0.02%                                |
| 397         | G             | 11.78%                       | S                    | 11.75%                       | -0.03%                                       | G11.78%; S11.75%; E4.65%; P4.63%; D4.45%; T4.32%; A3.71%; F3.53%; V3.24%; K3.22%; W2.65%; I2.55%; R2.42%; L1.75%; Y1.18%; H1.08%; Q0.75%; X0.74%; M0.43%; C0.08%; #0.02%                 |
| 137         | T             | 33.56%                       | N                    | 31.51%                       | -2.05%                                       | T33.56%; N31.51%; S7.98%; A4.22%; K3.22%; I3.17%; D3.08%; V2.95%; G2.01%; E1.16%; R1.15%; P0.88%; X0.75%; L0.72%; H0.64%; Y0.51%; C0.47%; Q0.29%; F0.23%; M0.11%; W0.08%; #0.05%         |
| 189         | S             | 4.27%                        | G                    | 0.95%                        | -3.32%                                       | S4.27%; G0.95%; T1.47%; T1.37%; D1.15%; G0.95%; E0.69%; I0.51%; A0.34%; R0.34%; R0.34%; W0.28%; Q0.23%; H0.18%; Y0.10%; M0.05%; L0.03%; X0.03%                                           |
| 440         | E             | 12.70%                       | Q                    | 7.72%                        | -4.98%                                       | E12.70%; Q7.72%; S14.76%; I2.70%; K10.00%; Q7.72%; P4.40%; N0.52%; G0.47%; T0.44%; D0.29%; X0.20%; I0.13%; M0.13%; Y0.10%; L0.07%; H0.03%; C0.02%                                        |
| 346         | A             | 32.98%                       | V                    | 24.71%                       | -8.27%                                       | A32.98%; V24.71%; S11.01%; K9.44%; G7.64%; T6.00%; R4.66%; E1.18%; I0.80%; Q0.34%; X0.25%; M0.21%; D0.20%; N0.16%; Y0.13%; F0.11%; L0.05%; H0.03%; #0.02%; W0.02%                        |
| 340         | K             | 27.67%                       | E                    | 18.36%                       | -9.31%                                       | K27.67%; E18.36%; D8.20%; T4.81%; R4.73%; S2.85%; Q1.62%; A1.44%; G0.97%; I0.75%; X0.34%; H0.29%; V0.18%; M0.10%; L0.05%                                                                 |
| 644         | S             | 13.35%                       | G                    | 3.17%                        | -10.18%                                      | S13.35%; G3.17%; N15.72%; S13.35%; E7.04%; G6.25%; D6.22%; G3.17%; Q3.13%; A0.92%; W0.70%; M0.51%; H0.44%; X0.25%; Y0.25%; I0.16%; L0.16%; F0.03%; C0.02%; P0.02%; V0.02%                |
| 185         | D             | 37.50%                       | N                    | 26.90%                       | -10.60%                                      | D37.50%; N26.90%; E11.08%; G9.42%; K5.48%; S4.34%; T1.34%; R0.70%; A0.67%; H0.54%; Q0.41%; X0.34%; I0.29%; V0.26%; P0.23%; Y0.13%; L0.10%; F0.08%; M0.05%                                |
| 188         | N             | 12.32%                       | Q                    | 0.98%                        | -11.34%                                      | N12.32%; Q0.98%; K3.35%; D2.39%; E1.54%; Q0.98%; T1.00%; G0.88%; R0.54%; A0.33%; V0.28%; H0.18%; I0.16%; P0.16%; X0.10%; Y0.10%; L0.08%; M0.05%; F0.02%                                  |
| 135         | N             | 32.35%                       | T                    | 20.48%                       | -11.87%                                      | N32.35%; T20.48%; K12.27%; S5.42%; V5.04%; I4.53%; R4.34%; L2.96%; G2.21%; E2.11%; D1.65%; Q1.10%; A0.98%; P0.83%; W0.77%; X0.69%; Y0.61%; H0.41%; C0.29%; F0.28%; M0.23%                |
| 640         | D             | 19.73%                       | Q                    | 7.82%                        | -11.91%                                      | D19.73%; Q7.82%; S11.39%; G7.82%; K3.01%; R1.69%; H1.59%; Y1.31%; T1.13%; A0.79%; X0.64%; Y0.21%; L0.20%; I0.13%; F0.10%; M0.02%; P0.02%                                                 |
| 161         | I             | 35.85%                       | M                    | 19.22%                       | -16.63%                                      | I35.85%; M19.22%; T11.04%; A9.20%; S0.67%; X0.21%; F0.20%; L0.15%; Y0.13%; N0.07%; R0.07%; K0.03%; E0.02%; G0.02%; P0.02%                                                                |
| 336         | T             | 35.00%                       | A                    | 17.28%                       | -17.72%                                      | T35.00%; A17.28%; E10.57%; K8.16%; S7.89%; G4.84%; D3.14%; Q2.39%; R2.11%; V1.94%; N1.64%; I1.18%; X0.56%; L0.46%; P0.33%; H0.23%; M0.18%; Y0.11%; W0.05%; #0.02%; F0.02%                |
| 620         | D             | 27.26%                       | S                    | 9.83%                        | -17.43%                                      | D27.26%; S9.83%; N16.48%; S9.83%; T8.30%; K4.52%; G3.16%; A2.26%; Q1.85%; H1.10%; R0.49%; X0.47%; P0.21%; I0.20%; V0.10%; L0.07%; W0.05%; Y0.05%; #0.02%; C0.02%                         |
| 142         | N             | 20.75%                       | D                    | 2.45%                        | -18.30%                                      | N20.75%; D2.45%; S11.60%; A3.62%; G3.47%; D2.45%; K1.73%; E0.98%; Y0.97%; R0.87%; X0.77%; H0.67%; Q0.67%; L0.59%; P0.51%; C0.46%; M0.33%; F0.29%; W0.08%; #0.02%; #0.02%                 |
| 141         | T             | 21.35%                       | D                    | 2.50%                        | -18.85%                                      | T21.35%; D2.50%; S11.47%; A4.63%; V3.52%; G3.13%; D2.50%; K2.32%; I2.23%; L1.28%; R1.18%; Y1.03%; E0.93%; Q0.85%; X0.64%; H0.62%; C0.57%; F0.51%; P0.46%; M0.41%; W0.23%                 |
| 139         | N             | 23.85%                       | I                    | 2.78%                        | -21.07%                                      | N23.85%; I2.78%; S11.50%; A5.78%; V4.34%; G3.42%; I2.78%; K1.98%; L1.03%; R1.03%; C0.92%; E0.87%; Y0.79%; H0.65%; X0.62%; F0.52%; Q0.38%; P0.36%; M0.21%; W0.07%; #0.02%                 |
| 335         | R             | 30.76%                       | K                    | 9.16%                        | -21.60%                                      | R30.76%; K9.16%; S19.16%; E13.71%; A3.70%; S3.37%; T1.49%; I1.16%; Q0.88%; N0.72%; L0.43%; X0.43%; V0.41%; M0.26%; F0.16%; Y0.15%; W0.10%; D0.08%; H0.05%                                |
| 343         | Q             | 29.19%                       | G                    | 4.74%                        | -24.45%                                      | Q29.19%; G4.74%; S13.01%; R10.88%; G4.74%; H3.99%; N3.57%; T2.57%; V2.19%; S1.70%; D0.92%; I0.75%; A0.64%; L0.61%; X0.34%; V0.33%; W0.15%; F0.13%; M0.07%; P0.05%; #0.02%; #0.02%        |
| 270         | I             | 61.14%                       | V                    | 36.50%                       | -24.64%                                      | I61.14%; V36.50%; T1.54%; M0.20%; A0.13%; L0.13%; E0.10%; X0.10%; D0.05%; P0.05%; F0.02%; K0.02%; N0.02%                                                                                 |
| 363         | P             | 34.38%                       | N                    | 8.92%                        | -25.46%                                      | P34.38%; N8.92%; S17.41%; N8.92%; H5.56%; K4.84%; R2.75%; A1.13%; E0.97%; T0.92%; G0.41%; X0.25%; D0.15%; L0.13%; I0.08%; M0.02%; V0.02%; Y0.02%                                         |
| 344         | Q             | 45.21%                       | K                    | 17.93%                       | -27.28%                                      | Q45.21%; K17.93%; R15.89%; E6.66%; N5.71%; G2.63%; L2.59%; M1.57%; W1.24%; H0.82%; D0.51%; A0.28%; S0.26%; Y0.23%; X0.20%; T0.07%; V0.07%; I0.05%; F0.02%; P0.02%                        |
| 396         | N             | 34.51%                       | I                    | 4.71%                        | -29.80%                                      | N34.51%; I4.71%; T9.28%; L6.63%; S6.20%; I4.71%; Y4.60%; D4.52%; M3.75%; K3.32%; E3.06%; P2.91%; F2.85%; G2.80%; H2.13%; R1.88%; V1.64%; W1.60%; Q0.93%; A0.82%; X0.46%; C0.07%; #0.03%  |
| 460         | N             | 36.50%                       | S                    | 6.32%                        | -30.18%                                      | N36.50%; S6.32%; K7.71%; S6.32%; G6.28%; I5.89%; E4.30%; V3.27%; R1.96%; H1.67%; L1.36%; P1.24%; Y0.83%; X0.49%; M0.39%; F0.16%; C0.08%; #0.02%; W0.02%                                  |
| 461         | N             | 39.79%                       | T                    | 9.51%                        | -30.28%                                      | N39.79%; T9.51%; D8.38%; S8.13%; E6.18%; K3.55%; I1.83%; R1.37%; H1.26%; V1.24%; Q1.11%; A1.08%; P0.87%; X0.47%; L0.46%; M0.33%; Y0.28%; C0.05%; F0.05%; W0.02%                          |
| 337         | K             | 34.73%                       | T                    | 1.46%                        | -33.27%                                      | K34.73%; T1.46%; E16.80%; Q12.19%; D9.75%; N7.95%; A7.67%; R2.55%; G1.49%; T1.46%; S1.42%; L0.98%; H0.67%; I0.51%; X0.43%; V0.39%; M0.08%; Y0.02%                                        |
| 271         | I             | 44.39%                       | M                    | 8.84%                        | -35.55%                                      | I44.39%; M8.84%; K1.80%; R1.39%; T0.98%; A0.67%; Q0.25%; E0.16%; L0.13%; X0.08%; S0.05%; D0.02%; G0.02%                                                                                  |
| 240         | K             | 36.91%                       | P                    | 0.15%                        | -36.76%                                      | K36.91%; P0.15%; N18.26%; R6.18%; H5.51%; Q3.17%; S2.93%; E0.95%; G0.56%; L0.47%; A0.39%; X0.34%; D0.16%; I0.16%; P0.15%; M0.10%; C0.05%; V0.03%; F0.02%                                 |
| 154         | I             | 42.21%                       | L                    | 4.38%                        | -37.83%                                      | I42.21%; L4.38%; M37.22%; V14.01%; L4.38%; R0.65%; T0.34%; X0.31%; A0.23%; Q0.15%; E0.11%; F0.10%; K0.10%; G0.03%; N0.03%; S0.03%; W0.03%; Y0.03%                                        |
| 507         | E             | 45.17%                       | G                    | 3.89%                        | -41.28%                                      | E45.17%; G3.89%; K3.89%; K1.93%; D1.69%; R0.69%; A0.52%; T0.51%; N0.20%; S0.11%; H0.10%; P0.05%; I0.03%; V0.03%; X0.03%; M0.02%; W0.02%                                                  |
| 588         | K             | 63.11%                       | R                    | 21.53%                       | -41.58%                                      | K63.11%; R21.53%; Q11.08%; G1.19%; S0.56%; E0.49%; H0.44%; T0.36%; A0.26%; N0.23%; M0.20%; X0.20%; V0.10%; W0.10%; Y0.10%; I0.03%; C0.02%; L0.02%                                        |
| 183         | P             | 63.45%                       | Q                    | 20.81%                       | -42.64%                                      | P63.45%; Q20.81%; S6.58%; K3.34%; E2.08%; A1.00%; L0.92%; R0.54%; H0.38%; N0.29%; T0.21%; G0.20%; X0.10%; D0.07%; V0.03%; #0.02%; I0.02%; Y0.02%                                         |
| 333         | I             | 65.12%                       | V                    | 20.98%                       | -44.14%                                      | I65.12%; V20.98%; L13.53%; M0.11%; X0.08%; F0.05%; T0.05%; P0.02%; S0.02%                                                                                                                |
| 351         | E             | 63.60%                       | K                    | 16.56%                       | -47.04%                                      | E63.60%; K16.56%; G3.83%; T2.81%; D2.47%; S2.19%; Q1.82%; N1.70%; A1.51%; R1.21%; W0.72%; I0.36%; X0.29%; P0.28%; H0.25%; L0.16%; Y0.07%; F0.03%; M0.03%; #0.02%; C0.02%                 |
| 413         | T             | 53.08%                       | S                    | 2.05%                        | -51.03%                                      | T53.08%; S2.05%; I7.15%; V2.55%; P2.36%; S2.05%; D1.67%; K0.79%; E0.74%; L0.59%; H0.56%; Y0.54%; X0.43%; A0.29%; F0.26%; M0.15%; R0.15%; Q0.08%; C0.02%; G0.02%; W0.02%                  |
| 283         | T             | 67.67%                       | N                    | 12.68%                       | -54.99%                                      | T67.67%; N12.68%; I13.74%; V2.25%; S1.03%; A0.23%; P0.15%; X0.08%; D0.03%; M0.03%; #0.02%; G0.02%; K0.02%; L0.02%; Y0.02%                                                                |
| 629         | M             | 71.14%                       | L                    | 10.98%                       | -60.16%                                      | M71.14%; L10.98%; T10.98%; T7.33%; V1.51%; R1.03%; Q0.57%; K0.34%; N0.26%; A0.15%; X0.07%; #0.02%; C0.02%; W0.02%                                                                        |
| 356         | K             | 70.40%                       | N                    | 2.34%                        | -68.06%                                      | K70.40%; N2.34%; S14.25%; R5.69%; T2.34%; S2.26%; A1.69%; E0.85%; G0.82%; I0.39%; Q0.38%; X0.25%; D0.20%; P0.10%; V0.08%; M0.07%; H0.05%; L0.03%; #0.02%; F0.02%; Y0.02%                 |
| 130         | N             | 69.00%                       | Q                    | 0.88%                        | -68.12%                                      | N69.00%; Q0.88%; E0.05%; D5.64%; H5.58%; K4.74%; T2.96%; S1.85%; R1.18%; I0.90%; Q0.88%; X0.38%; X0.29%; L0.21%; M0.11%; #0.07%; A0.03%; F0.03%; V0.03%; C0.02%; W0.02%                  |
| 92          | N             | 75.18%                       | E                    | 6.90%                        | -68.28%                                      | N75.18%; E6.90%; D6.64%; K4.14%; Y2.55%; S1.26%; T0.88%; P0.79%; H0.57%; Q0.39%; R0.21%; G0.13%; X0.13%; A0.05%; M0.05%; Y0.05%; I0.03%; L0.02%; W0.02%                                  |
| 453         | L             | 84.00%                       | I                    | 14.92%                       | -69.08%                                      | L84.00%; I14.92%; M0.52%; V0.23%; F0.08%; X0.07%; G0.05%; P0.03%; R0.02%; S0.02%; T0.02%; Y0.02%                                                                                         |
| 348         | K             | 81.14%                       | Q                    | 11.71%                       | -69.43%                                      | K81.14%; Q11.71%; E3.98%; R1.23%; T0.52%; A0.36%; L0.26%; X0.15%; N0.11%; S0.11%; H0.08%; Y0.07%; #0.03%; F0.02%; G0.02%; M0.02%                                                         |
| 617         | K             | 84.88%                       | R                    | 13.40%                       | -71.48%                                      | K84.88%; R13.40%; T0.52%; S0.21%; N0.11%; X0.11%; I0.10%; E0.08%; L0.08%; G0.07%; D0.03%; V0.03%; Y0.03%; #0.02%; F0.02%; M0.02%; Q0.02%                                                 |
| 618         | S             | 77.08%                       | N                    | 4.71%                        | -72.37%                                      | S77.08%; N4.71%; P0.34%; D0.16%; A0.15%; X0.11%; Y0.11%; K0.10%; E0.07%; G0.05%; L0.05%; #0.02%; F0.02%; Q0.02%; R0.02%; W0.02%                                                          |
| 371         | I             | 86.34%                       | V                    | 11.68%                       | -74.66%                                      | I86.34%; V11.68%; L0.93%; T0.64%; M0.11%; X0.10%; S0.05%; N0.03%; #0.02%; D0.02%; F0.02%; Q0.02%; R0.02%                                                                                 |
| 567         | Q             | 85.24%                       | K                    | 10.50%                       | -74.74%                                      | Q85.24%; K10.50%; R4.06%; X0.07%; E0.05%; L0.05%; N0.02%; P0.02%                                                                                                                         |
| 174         | A             | 88.45%                       | S                    | 10.75%                       | -77.70%                                      | A88.45%; S10.75%; V0.28%; T0.20%; G0.18%; D0.03%; E0.03%; K0.03%; X0.03%; P0.02%                                                                                                         |
| 288         | L             | 92.52%                       | F                    | 7.28%                        | -85.24%                                      | L92.52%; F7.28%; M0.07%; X0.03%; #0.02%; P0.02%; S0.02%; V0.02%; W0.02%                                                                                                                  |
| 430         | V             | 90.92%                       | I                    | 1.11%                        | -89.81%                                      | V90.92%; I1.11%; T2.83%; L0.20%; G0.11%; P0.11%; E0.08%; #0.03%; S0.02%                                                                                                                  |
| 285         | I             | 97.32%                       | L                    | 2.09%                        | -95.23%                                      | I97.32%; L2.09%; M0.33%; T0.15%; V0.07%; A0.02%; X0.02%                                                                                                                                  |
| 241         | N             | 97.19%                       | S                    | 0.99%                        | -96.80%                                      | N97.19%; S0.99%; X0.92%; S0.39%; E0.16%; H0.07%; T0.07%; X0.05%; Y0.05%; I0.03%; Q0.03%; #0.02%; C0.02%; G0.02%; M0.02%; R0.02%                                                          |

Supplementary Table 3. Amino acid conservation analysis of ConM and BG505 sequences used for generating Fig. 2c

| Tier categorization           |                  |                               |                  |
|-------------------------------|------------------|-------------------------------|------------------|
| Tier Phenotyping GMT Window 1 |                  | Tier Phenotyping GMT Window 2 |                  |
| Tier 1A                       | >1000            | Tier 1A                       | >1000            |
| Tier 1B                       | 250-1000         | Tier 1B                       | 400-700          |
| Tier 2                        | 50-250           | Tier 2                        | 100-400          |
| Tier 3                        | <50              | Tier 3                        | <100             |
|                               | ConM             |                               | ConS             |
|                               | Tier 1A          |                               | Tier 1B          |
| Sample ID                     | ID <sub>50</sub> | Sample ID                     | ID <sub>50</sub> |
| CHAVI-0406 pool               | 6111             | CHAVI-0537 pool               | 1788             |
| CHAVI-0060 pool               | 655              | CHAVI-0468 pool               | 72               |
| CHAVI-0642 pool               | 3909             | CHAVI-0461 pool               | 196              |
| CHAVI-0293 pool               | 3931             | CHAVI-0383 pool               | 270              |
| CHAVI-0598 pool               | 43740            | CHAVI-0134 pool               | 4962             |
| CHAVI-0585 pool               | 135              | GMT                           | 508              |
| GMT                           | 2671             |                               |                  |

| Antibody neutralization |                 |                  |               |                  |         |
|-------------------------|-----------------|------------------|---------------|------------------|---------|
|                         |                 | ConM             |               |                  | ConS    |
|                         |                 | Tier 1A          |               |                  | Tier 1B |
| Antibody                | Epitope         | ID <sub>50</sub> | Antibody      | ID <sub>50</sub> |         |
| 2219                    | V3              | >25              | 2219          | >25              |         |
| 2557                    | V3              | 23               | 2557          | >25              |         |
| 3074                    | V3              | 13.2             | 3074          | >25              |         |
| 3869                    | V3              | 23.6             | 3869          | >25              |         |
| 447-52D                 | V3              | >25              | 447-52D       | >25              |         |
| 838-12D                 | V3              | 23               | 838-12D       | >25              |         |
| 830A                    | V2              | >25              | 830A          | N.A.             |         |
| 654-30D                 | CD4bs           | 24.1             | 654-30D       | >25              |         |
| 1008-30D                | CD4bs           | >25              | 1008-30D      | >25              |         |
| 1570D                   | CD4bs           | 14               | 1570D         | >25              |         |
| 729-30D                 | CD4bs           | 19.5             | 729-30D       | 24.4             |         |
| F105                    | CD4bs           | N.A.             | F105          | >25              |         |
| 181D                    | gp41(cluster I) | 16.7             | 181D          | N.A.             |         |
| 246D                    | gp41(cluster I) | 15.9             | 246D          | N.A.             |         |
| 240D                    | gp41(cluster I) | >25              | 240D          | N.A.             |         |
| 50-69D                  | gp41(cluster I) | 6.2              | 50-69D        | N.A.             |         |
| sCD4                    | CD4bs           | 21.2             | sCD4          | 18.6             |         |
| VRC01                   | CD4bs           | 0.19             | VRC01         | 1.44             |         |
| 3BNC117                 | CD4bs           | <0.01            | 3BNC117       | 0.25             |         |
| CH31                    | CD4bs           | 0.53             | CH31          | 1.2              |         |
| PG9                     | V2-glycan       | 0.03             | PG9           | 0.03             |         |
| PG16                    | V2-glycan       | 0.005            | PG16          | 0.02             |         |
| CH01                    | V2-glycan       | 14.8             | CH01          | 12.2             |         |
| PGDM1400                | V2-glycan       | N.A.             | PGDM1400      | 0.05             |         |
| PGT128                  | V3-glycan       | <0.002           | PGT128        | 0.01             |         |
| PGT121                  | V3-glycan       | 0.003            | PGT121        | 0.02             |         |
| 10-1074                 | V3-glycan       | <0.01            | 10-1074       | <0.01            |         |
| PGT151                  | gp120/gp41      | <0.002           | PGT151        | <0.002           |         |
| VRC34.01                | gp120/gp41      | N.A.             | VRC34.01      | 0.2              |         |
| 2G12                    | glycan          | >25              | 2G12          | 3.33             |         |
| DH511.2.K3_4a           | MPER            | N.A.             | DH511.2.K3_4a | 0.23             |         |
| 10E8                    | MPER            | N.A.             | 10E8          | 0.65             |         |
| 2F5                     | MPER            | N.A.             | 2F5           | 1.23             |         |
| 4E10                    | MPER            | 1.69             | 4E10          | 2.17             |         |
| HIVIG-C                 |                 | 4.83             | HIVIG-C       | 29               |         |
| CH01-31                 |                 | N.A.             | CH01-31       | 0.97             |         |

**Supplementary Table 4.** Characterization of the ConM and ConS viruses. Top: tier categorization of the ConM and ConS viruses using a panel of reference sera pool. Bottom: analysis of the sensitivity of ConM and ConS to a panel of bNAbs and non-NAbs. The TZM-bl cell assays were performed at DUMC. GMT: geometric mean titer. N.A: not tested.

| Week 22                                 | Control   |     | Autologous |        |        |        | Heterologous Tier 1 |       |       |          |        |        |      |      |      |       | Heterologous Tier 2       |                    |      |       |       |        |      |                              |                       |            |            |                             |        |        |        |                           |      |
|-----------------------------------------|-----------|-----|------------|--------|--------|--------|---------------------|-------|-------|----------|--------|--------|------|------|------|-------|---------------------------|--------------------|------|-------|-------|--------|------|------------------------------|-----------------------|------------|------------|-----------------------------|--------|--------|--------|---------------------------|------|
|                                         | Virus     | MLV | MLV        | ConM   | ConM   | ConM   | ConM                | SF162 | SF162 | MW965.26 | AMC008 | ZM197M | ConS | ConS | ConS | BG505 | 246-F3_C10_2 <sup>a</sup> | CNE55 <sup>a</sup> | RE10 | SHVp3 | SHVp3 | TRO.11 | WITO | BJ02002000.03_2 <sup>a</sup> | CH119.10 <sup>a</sup> | 25710-2.43 | Cell176_A3 | Ce703010217_B6 <sup>a</sup> | TV1.21 | TV1.21 | TV1.29 | Y1632-S2-B10 <sup>a</sup> |      |
|                                         | Tier      |     |            | 1A     | 1A     | 1A     | 1A                  | 1A    | 1A    | 1A       | 1B     | 1B     | 1B   | 1B   | 1B   | 2     | 2                         | 2                  | 2    | 2     | 2     | 2      | 2    | 2                            | 2                     | 2          | 2          | 2                           | 2      | 2      | 2      | 2                         | 2    |
|                                         | Clade     | AMC | DUMC       | AMC    | DUMC   | OSR    | ISCIH               | AMC   | ISCIH | DUMC     | AMC    | AMC    | AMC  | DUMC | OSR  | AMC   | DUMC                      | DUMC               | AMC  | AMC   | OSR   | DUMC   | AMC  | DUMC                         | DUMC                  | DUMC       | DUMC       | DUMC                        | DUMC   | AMC    | DUMC   | OSR                       | DUMC |
| Immunogen                               | Lab       | AMC | DUMC       | AMC    | DUMC   | OSR    | ISCIH               | AMC   | ISCIH | DUMC     | AMC    | AMC    | AMC  | DUMC | OSR  | AMC   | DUMC                      | DUMC               | AMC  | AMC   | OSR   | DUMC   | AMC  | DUMC                         | DUMC                  | DUMC       | DUMC       | DUMC                        | AMC    | DUMC   | OSR    | DUMC                      |      |
| ConM SOSIP.v7<br>(ISCOMATRIX™)          | 1839      | <20 | <20        | 56944  | 46649  | 58493  | 49939               | 29    | <20   | 449      | <20    | <20    | 231  | 109  | 175  | <20   | <20                       | <20                | <20  | <20   |       | <20    | <20  | <20                          | <20                   | <20        | <20        | <20                         | <20    | <20    | <20    | <20                       |      |
|                                         | 1840      | <20 | <20        | 14555  | 14353  | 79497  | 88150               | 26    | <20   | 218      | <20    | <20    | 308  | 82   | 127  | <20   | <20                       | <20                | 34   | 37    |       | <20    | <20  | <20                          | <20                   | <20        | <20        | <20                         | <20    | <20    | <20    | <20                       |      |
|                                         | 1841      | <20 | <20        | 80585  | 64681  | 48657  | 91919               | <20   | <20   | 116      | <20    | <20    | 123  | 54   | 44   | <20   | <20                       | <20                | 30   | <20   |       | <20    | <20  | <20                          | <20                   | <20        | <20        | <20                         | <20    | <20    | <20    | <20                       | <20  |
|                                         | 1842      | <20 | <20        | 16010  | 16106  | 10482  | 24314               | 24    | 62    | 114      | <20    | <20    | 71   | 40   | 216  | <20   | <20                       | <20                | 40   | <20   |       | <20    | <20  | <20                          | <20                   | <20        | <20        | <20                         | <20    | <20    | <20    | <20                       | <20  |
| ConM SOSIP.v7-ferritin<br>(ISCOMATRIX™) | 1809      | <20 | <20        | 31880  | 36017  | 28178  | 21227               | 52    | 27    | 21599    | <20    | <20    | 2163 | 1149 | 797  | <20   | <20                       | <20                | <20  | <20   |       | <20    | <20  | <20                          | <20                   | <20        | <20        | <20                         | <20    | <20    | 207    | <20                       |      |
|                                         | 1810      | <20 | <20        | 25953  | 56137  | 16014  | 8007                | 61    | 28    | 3732     | <20    | <20    | 391  | 290  | 696  | <20   | <20                       | <20                | 34   | <20   |       | <20    | <20  | <20                          | <20                   | <20        | <20        | <20                         | <20    | 107    | <20    | <20                       |      |
|                                         | 1811      | <20 | <20        | 44432  | 70273  | 26597  | 10609               | 583   | 72    | 9982     | <20    | <20    | 3321 | 1344 | 1485 | <20   | <20                       | <20                | 26   | 62    |       | <20    | <20  | <20                          | <20                   | <20        | <20        | <20                         | <20    | 158    | <20    | <20                       |      |
|                                         | 1812      | <20 | <20        | 203036 | 164177 | 152493 | 43901               | 1437  | 405   | 3486     | <20    | <20    | 6199 | 3000 | 2630 | <20   | <20                       | <20                | <20  | <20   |       | <20    | <20  | <20                          | <20                   | <20        | <20        | <20                         | <20    | 65     | <20    | <20                       |      |
| ConM SOSIP.v7<br>(SE)                   | 1.1       | <20 | <20        | 5110   | 2107   |        |                     | <20   |       | 423      |        |        | 423  | 116  |      |       |                           |                    |      |       | <20   |        |      |                              |                       |            |            |                             |        | 23     | <20    | <20                       |      |
|                                         | 1.2       | <20 | <20        | 6757   | 3012   |        |                     | <20   |       | 448      |        |        | 448  | 83   |      |       |                           |                    |      |       | <20   |        |      |                              |                       |            |            |                             |        | 33     | <20    | <20                       | <20  |
|                                         | 1.3       | <20 | <20        | 16917  | 3893   |        |                     | <20   |       | 264      |        |        | 264  | 33   |      |       |                           |                    |      |       | <20   |        |      |                              |                       |            |            |                             |        | <20    | <20    | <20                       | <20  |
|                                         | 1.4       | <20 | <20        | 82485  | 34782  |        |                     | <20   |       | 327      |        |        | 327  | 64   |      |       |                           |                    |      |       | <20   |        |      |                              |                       |            |            |                             |        | 24     | <20    | <20                       | <20  |
|                                         | 1.5       | <20 | <20        | 809    | 204    |        |                     | <20   |       | 65       |        |        | 65   | 20   |      |       |                           |                    |      |       | <20   |        |      |                              |                       |            |            |                             |        | 24     | <20    | <20                       | <20  |
|                                         | 1.6       | <20 | <20        | 6355   | 6345   |        |                     | <20   |       | 64       |        |        | 64   | 166  |      |       |                           |                    |      |       | <20   |        |      |                              |                       |            |            |                             |        | 27     | <20    | <20                       | <20  |
| ConM SOSIP.v7-ferritin<br>(SE)          | 4.1       | 23  |            | 79605  | 52368  |        |                     | 488   |       |          |        |        | 3548 | 757  |      |       |                           |                    |      |       | <20   |        |      |                              |                       |            |            |                             |        | 127    | <20    | <20                       | <20  |
|                                         | 4.2       | <20 | <20        | 52461  | 16086  |        |                     | 192   |       |          |        |        | 1877 | 496  |      |       |                           |                    |      |       | <20   |        |      |                              |                       |            |            |                             |        | <20    | <20    | <20                       | <20  |
|                                         | 4.3       | <20 | <20        | 34131  | 8033   |        |                     | 691   |       |          |        |        | 1771 | 1211 |      |       |                           |                    |      |       | <20   |        |      |                              |                       |            |            |                             |        | 422    | <20    | <20                       | <20  |
|                                         | 4.4       | <20 | <20        | 86348  | 16255  |        |                     | 8650  |       |          |        |        | 1072 | 126  |      |       |                           |                    |      |       | <20   |        |      |                              |                       |            |            |                             |        | 169    | <20    | <20                       | <20  |
|                                         | 4.5       | <20 | <20        | 117823 | 23534  |        |                     | 178   |       |          |        |        | 880  | 382  |      |       |                           |                    |      |       | <20   |        |      |                              |                       |            |            |                             |        | 60     | <20    | <20                       | <20  |
|                                         | 4.6       | <20 | <20        | 82326  | 25108  |        |                     | 1231  |       |          |        |        | 2306 | 782  |      |       |                           |                    |      |       | <20   |        |      |                              |                       |            |            |                             |        | 123    | <20    | <20                       | <20  |
|                                         | Rabbit ID |     |            |        |        |        |                     |       |       |          |        |        |      |      |      |       |                           |                    |      |       |       |        |      |                              |                       |            |            |                             |        |        |        |                           |      |

**Supplementary Table 5.** Midpoint neutralization titers for sera from rabbits immunized with ConM SOSIP.v7 or ConM SOSIP.v7-ferritin. Sera (from week 22, unless otherwise noted) were tested against a panel of Env-pseudotyped viruses in a standard TZM-bl assay. Upper part: neutralization titers for sera from rabbits immunized with ConM SOSIP.v7 or ConM SOSIP.v7-ferritin receiving ISCOMATRIX™ adjuvant. Immunizations were carried out by Covance (Denver, USA). The neutralization assays were performed at AMC, DUMC, OSR and ISCIH. Lower part: neutralization titers for week 22 sera from rabbits immunized with ConM SOSIP.v7 or ConM SOSIP.v7-ferritin formulated with Squalene Emulsion (SE) adjuvant. Immunizations were carried out by NFCSO-DVMP (Gödöllő, Hungary). The TZM-bl cell assays were performed at AMC and OSR. The boxes are colored according to their magnitude. ID50 <20 in white; ID50 20-40 in grey; ID50 40-100 in yellow; ID50 100-1000 in orange; ID50 1000-10000 in red; ID50 10000-100000 in pink; ID50 >100000 in purple; <sup>a</sup>week 38 sera dilutions.

| Week 22                | Virus           | MLV | Autologous |            |            |
|------------------------|-----------------|-----|------------|------------|------------|
|                        |                 |     | ConM       | ConM       | ConM       |
|                        | Tier            |     | 1A         | 1A         | 1A         |
| Immunogen              | Dump-in Protein |     |            | V3 Peptide | ConM D368R |
| ConM SOSIP.v7          | 1839            | <20 | >4860      | >4860      | 46         |
|                        | 1840            | 31  | >4860      | >4860      | 53         |
|                        | 1841            | <20 | >4860      | >4860      | 55         |
|                        | 1842            | <20 | >4860      | >4860      | 26         |
|                        | 1843            | <20 | >4860      | >4860      | <20        |
| ConM SOSIP.v7-ferritin | 1809            | <20 | >4860      | >4860      | 49         |
|                        | 1810            | <20 | >4860      | >4860      | 45         |
|                        | 1811            | <20 | >4860      | >4860      | 45         |
|                        | 1812            | <20 | >4860      | >4860      | 38         |
|                        | 1813            | <20 | >4860      | >4860      | 135        |
|                        | Rabbit ID       |     |            |            |            |

**Supplementary Table 6.** Neutralization depletion experiment with ConM virus. Midpoint neutralization titers for sera from rabbits against ConM virus with or without cyclic ConM V3 peptide (which is identical to that of BG505) and ConM SOSIP.v7 D368R trimer as competitors.





| Week 22                 | Virus<br>Tier<br>Clade | Control |      | Autologous |      |        |        | Heterologous Tier 1 |          |      |      | Heterologous Tier 2 |              |       |      |        |        |             |                 |          |            |           |                |        |              |
|-------------------------|------------------------|---------|------|------------|------|--------|--------|---------------------|----------|------|------|---------------------|--------------|-------|------|--------|--------|-------------|-----------------|----------|------------|-----------|----------------|--------|--------------|
|                         |                        | MLV     | MLV  | ConM       | ConM | AMC008 | AMC011 | SF162               | MW965.26 | ConS | ConS | 398_F1_F6_20        | 246-F3_C10_2 | CNE55 | REJO | SHIVp3 | TRO.11 | X2278-C2-B6 | BIOX002000.03.2 | CH119.10 | 25710-2.43 | Ce1176_A3 | Ce703010217_B6 | TV1.21 | X1632-S2-B10 |
|                         |                        |         |      | 1A         | 1A   | 1B     | 2      | 1A                  | 1A       | 1B   | 1B   | 2                   | 2            | 2     | 2    | 2      | 2      | 2           | 2               | 2        | 2          | 2         | 2              | 2      | 2            |
| Immunogen               | Lab                    | AMC     | DUMC | AMC        | DUMC | AMC    | AMC    | AMC                 | DUMC     | AMC  | DUMC | DUMC                | DUMC         | AMC   | AMC  | DUMC   | DUMC   | DUMC        | DUMC            | DUMC     | DUMC       | DUMC      | DUMC           | DUMC   | DUMC         |
| SOSIP-ferritin cocktail | r05048                 | <20     | 23   | 1416       | 890  | <20    | <20    | 152                 | 403      | <20  | 117  | 26                  | <20          | <20   | <20  | <20    | <20    | <20         | <20             | <20      | <20        | <20       | <20            | <20    | <20          |
|                         | r10078                 | <20     | <20  | 1750       | 801  | <20    | <20    | 286                 | 490      | <20  | 100  | 22                  | <20          | <20   | <20  | <20    | <20    | <20         | <20             | <20      | <20        | <20       | <20            | <20    | <20          |
|                         | r11043                 | <20     | <20  | >4860      | 2417 | <20    | <20    | 720                 | 955      | 58   | 129  | <20                 | <20          | <20   | <20  | <20    | <20    | <20         | <20             | <20      | <20        | <20       | <20            | <20    | <20          |
|                         | r08003                 | <20     | <20  | >4860      | 5227 | <20    | <20    | 3124                | 3369     | 140  | 210  | <20                 | <20          | <20   | <20  | <20    | <20    | <20         | <20             | <20      | <20        | <20       | <20            | <20    | <20          |
|                         | r09093                 | <20     | <20  | >4860      | 1377 | <20    | <20    | 1248                | 801      | 103  | 148  | <20                 | <20          | <20   | <20  | <20    | <20    | <20         | <20             | <20      | <20        | <20       | <20            | <20    | <20          |
|                         | r10064                 | <20     | <20  | 1923       | 2383 | <20    | <20    | 955                 | 677      | 23   | 74   | <20                 | <20          | <20   | <20  | <20    | <20    | <20         | <20             | <20      | <20        | <20       | <20            | <20    | <20          |
| negative controls       | r09038                 | <20     | 23   | <20        | <20  | <20    | <20    | <20                 | <20      | <20  | <20  |                     |              | <20   | <20  |        |        |             |                 |          |            |           |                |        |              |
|                         | r10045                 | <20     | 27   | <20        | <20  | <20    | <20    | <20                 | <20      | <20  | <20  |                     |              | <20   | <20  |        |        |             |                 |          |            |           |                |        |              |
|                         | Macaque ID             |         |      |            |      |        |        |                     |          |      |      |                     |              |       |      |        |        |             |                 |          |            |           |                |        |              |

**Supplementary Table 8.** Neutralization by sera from macaques immunized with a trivalent cocktail of SOSIP-ferritin nanoparticles. Midpoint neutralization titers were determined for a panel of Env-pseudotyped viruses in the TZM-bl cell assay (performed at AMC and DUMC).

| Week 22 plasma                        | Virus      |     | ConS        |            |           |           |           |           |                |            |             |             | TV1.21    |             |       |     | MW965.26 |         |   | SF162.LS |         |   | depletion peptide |
|---------------------------------------|------------|-----|-------------|------------|-----------|-----------|-----------|-----------|----------------|------------|-------------|-------------|-----------|-------------|-------|-----|----------|---------|---|----------|---------|---|-------------------|
|                                       | Mutant     | MLV | Y173A       | T236K      | N295A     | N301A     | G324A     | N332A     | V518L          | T607S      | W680R K683Q | N160A       | N332A     | K169E       | N276A | -   | scramble | ConM V3 | - | scramble | ConM V3 |   |                   |
|                                       |            |     | V1V2 glycan | gp120-gp41 | 2G12 sens | V3 glycan | V3 glycan | V3 glycan | fusion peptide | gp120-gp41 | MPER        | V1V2 glycan | V3 glycan | V1V2 glycan | CD4BS |     |          |         |   |          |         |   |                   |
| Immunogen                             | Clade      | -   |             |            |           |           |           |           |                |            |             |             |           |             |       |     |          |         |   |          |         |   |                   |
| SOSIP-ferritin cocktail               | r05048     | 70  | 458         | 297        | 294       | 203       | 172       | 468       | 127            | 158        | 143         | 343         | 48        | 56          | 79    | <30 | 73       | C       | C | C        | B       | B | B                 |
|                                       | r10078     | 57  | 459         | 227        | 249       | 478       | 363       | 417       | 285            | 442        | 140         | 529         | 60        | 47          | 78    | <30 | 68       |         |   |          |         |   |                   |
|                                       | r11043     | 43  | 324         | 193        | 281       | 233       | 195       | 241       | 241            | 275        | 131         | 301         | 30        | 55          | 125   | <30 | 74       |         |   |          |         |   |                   |
|                                       | r08003     | 65  | 503         | 307        | 421       | 489       | 460       | 568       | 277            | 490        | 275         | 675         | 148       | 148         | 748   | 34  | 208      |         |   |          |         |   |                   |
|                                       | r09093     | 45  | 287         | 240        | 204       | 234       | 168       | 325       | 132            | 206        | 150         | 295         | 61        | 58          | 110   | <30 | 74       |         |   |          |         |   |                   |
|                                       | r10064     | 39  | 266         | 175        | 179       | 193       | 195       | 295       | 96             | 202        | 96          | 385         | 67        | 56          | 88    | <30 | 75       |         |   |          |         |   |                   |
| negative controls                     | r09038     | 38  | 94          | 78         | 112       | 45        | 45        | 140       | 49             | 72         | 32          | 87          | <20       | <30         | 36    | <30 | 40       |         |   |          |         |   |                   |
|                                       | r10045     | 46  | 146         | 78         | 157       | 35        | 78        | 177       | 30             | 106        | 34          | 137         | <20       | <30         | 36    | <30 | 40       |         |   |          |         |   |                   |
| SOSIP-ferritin cocktail (fold change) | r05048     |     |             |            | 1.5       | 1.6       | 2.3       | 2.7       | 1.0            | 3.6        | 2.9         | 3.2         | 1.3       |             |       |     |          |         |   |          |         |   |                   |
|                                       | r10078     |     |             |            | 2.0       | 1.8       | 1.0       | 1.3       | 1.1            | 1.6        | 1.0         | 3.3         | 0.9       |             |       |     |          |         |   |          |         |   |                   |
|                                       | r11043     |     |             |            | 1.7       | 1.2       | 1.4       | 1.7       | 1.3            | 1.3        | 1.2         | 2.5         | 1.1       |             |       |     |          |         |   |          |         |   |                   |
|                                       | r08003     |     |             |            | 1.6       | 1.2       | 1.0       | 1.1       | 0.9            | 1.8        | 1.0         | 1.8         | 0.7       |             |       |     |          |         |   |          |         |   |                   |
|                                       | r09093     |     |             |            | 1.2       | 1.4       | 1.2       | 1.7       | 0.9            | 2.2        | 1.4         | 1.9         | 1.0       |             |       |     |          |         |   |          |         |   |                   |
|                                       | r10064     |     |             |            | 1.5       | 1.5       | 1.4       | 1.4       | 0.9            | 2.8        | 1.3         | 2.8         | 0.7       |             |       |     |          |         |   |          |         |   |                   |
| negative controls (fold change)       | r09038     |     |             |            | 1.2       | 0.8       | 2.1       | 2.1       | 0.7            | 1.9        | 1.3         | 2.9         | 1.1       |             |       |     |          |         |   |          |         |   |                   |
|                                       | r10045     |     |             |            | 1.9       | 0.9       | 4.2       | 1.9       | 0.8            | 4.9        | 1.4         | 4.3         | 1.1       |             |       |     |          |         |   |          |         |   |                   |
|                                       | Macaque ID |     |             |            |           |           |           |           |                |            |             |             |           |             |       |     |          |         |   |          |         |   |                   |

**Supplementary Table 9.** Mapping of the neutralizing epitopes on ConS, TV1.21, MW965.26 and SF162.LS for immunized macaques. Midpoint neutralization titers of plasma from macaques immunized with a trivalent cocktail of SOSIP-ferritin against a panel of heterologous ConS and TV1.21 mutant viruses (left) and MW965.26 and SF162.LS depleting the sera using scrambled or ConM V3 peptide (right). The TZM-bl cell assays were performed at DUMC. Note the relatively high MLV neutralization titers. Lower part: fold change in ID50 titers (ID50 virus/ID50 mutant virus). Fold change <0.25 in grey; 0.25-2.5 in white; 2.5-10 in light blue; >10 in dark blue.

### Supplementary References

1. de Taeye, S. W. *et al.* Immunogenicity of stabilized HIV-1 envelope trimers with reduced exposure of non-neutralizing epitopes. *Cell* **163**, 1702–15 (2015).
2. Torrents de la Peña, A. *et al.* Improving the immunogenicity of native-like HIV-1 envelope trimers by hyperstabilization. *Cell Rep* **20**, 1805–1817 (2017).
3. Guenaga, J. *et al.* Structure-guided redesign increases the propensity of HIV Env to generate highly stable soluble trimers. *J. Virol.* **90**, 2806–17 (2015).
4. Behrens, A.-J. *et al.* Composition and antigenic effects of individual glycan sites of a trimeric HIV-1 envelope glycoprotein. *Cell Rep* **14**, 2695–706 (2016).
5. Stewart-Jones, G. B. E. *et al.* Trimeric HIV-1-Env structures define glycan shields from clades A, B, and G. *Cell* **165**, 813–26 (2016).
